# Supplementary material for: Synthesis of Amino-Acid-Based Nitroalkenes
Source: MDPI journal article supplement (doi:10.3390/org3020011), 2022-06-14

# Synthesis of Amino Acid-based Nitroalkenes

**Velisaria E. Gerogianni,<sup>1,2</sup> Giorgos S. Koutoulogenis,<sup>1,2</sup> Dimitrios  
Triantafyllos Gerokostas,<sup>1,2</sup> George Kokotos<sup>1,2\*</sup>**

*<sup>1</sup>Laboratory of Organic Chemistry, Department of Chemistry, National and  
Kapodistrian University of Athens, Panepistimiopolis, Athens 15771, Greece*

*<sup>2</sup>Center of Excellence for Drug Design and Discovery, National and Kapodistrian  
University of Athens, Athens 15771, Greece*

## SUPPLEMENTARY MATERIALS

|                                                                           |                |
|---------------------------------------------------------------------------|----------------|
| <b><math>^1\text{H}</math> and <math>^{13}\text{C}</math> NMR Spectra</b> | <b>Page S3</b> |
|---------------------------------------------------------------------------|----------------|

## (2a)

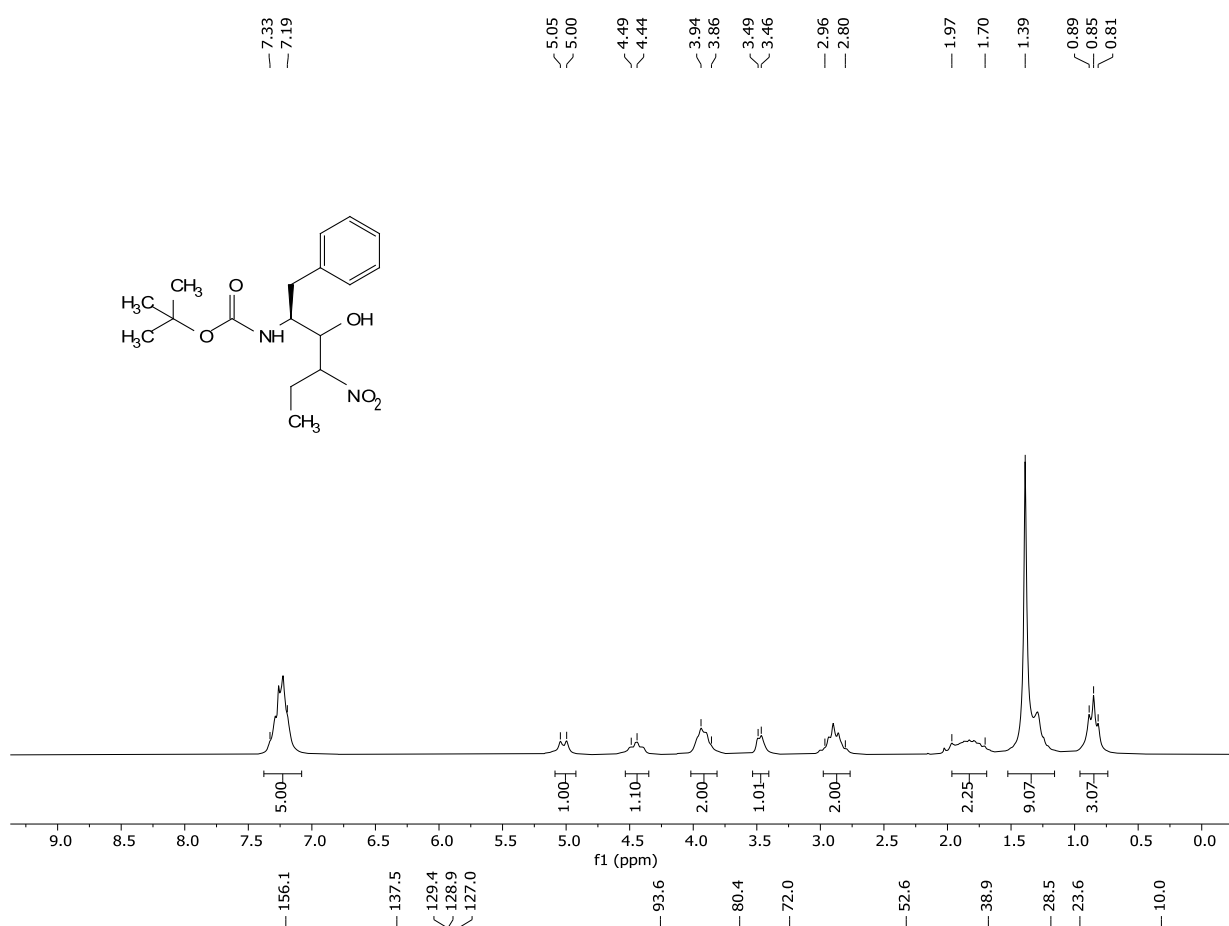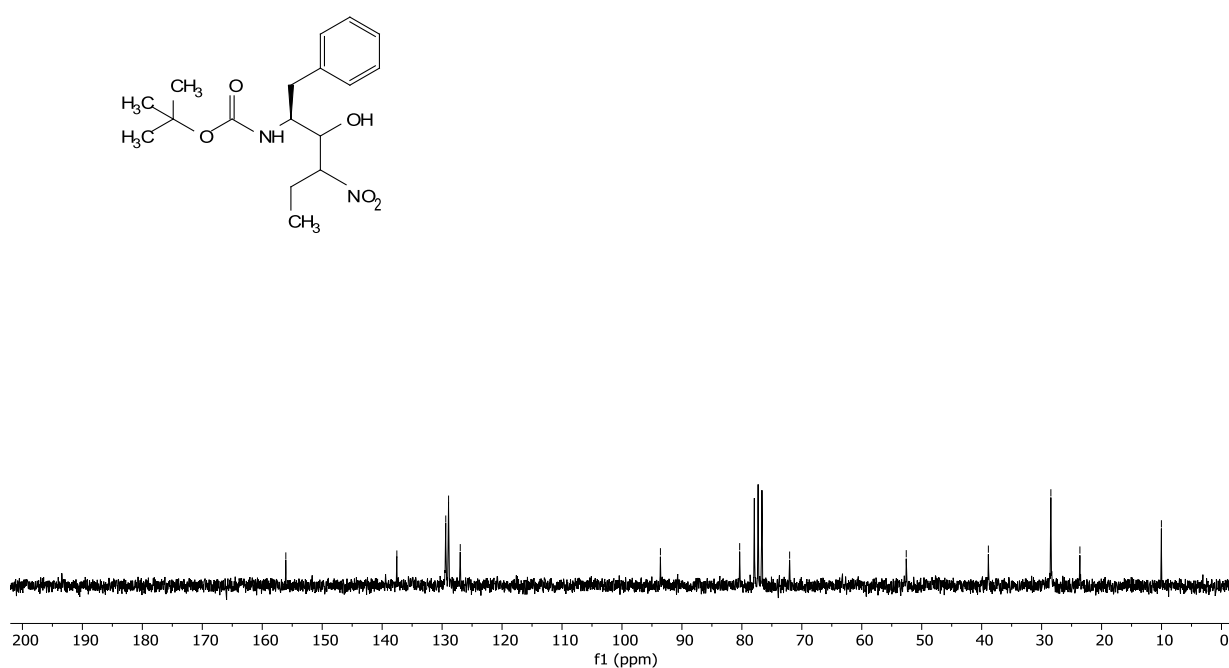

## (2b)

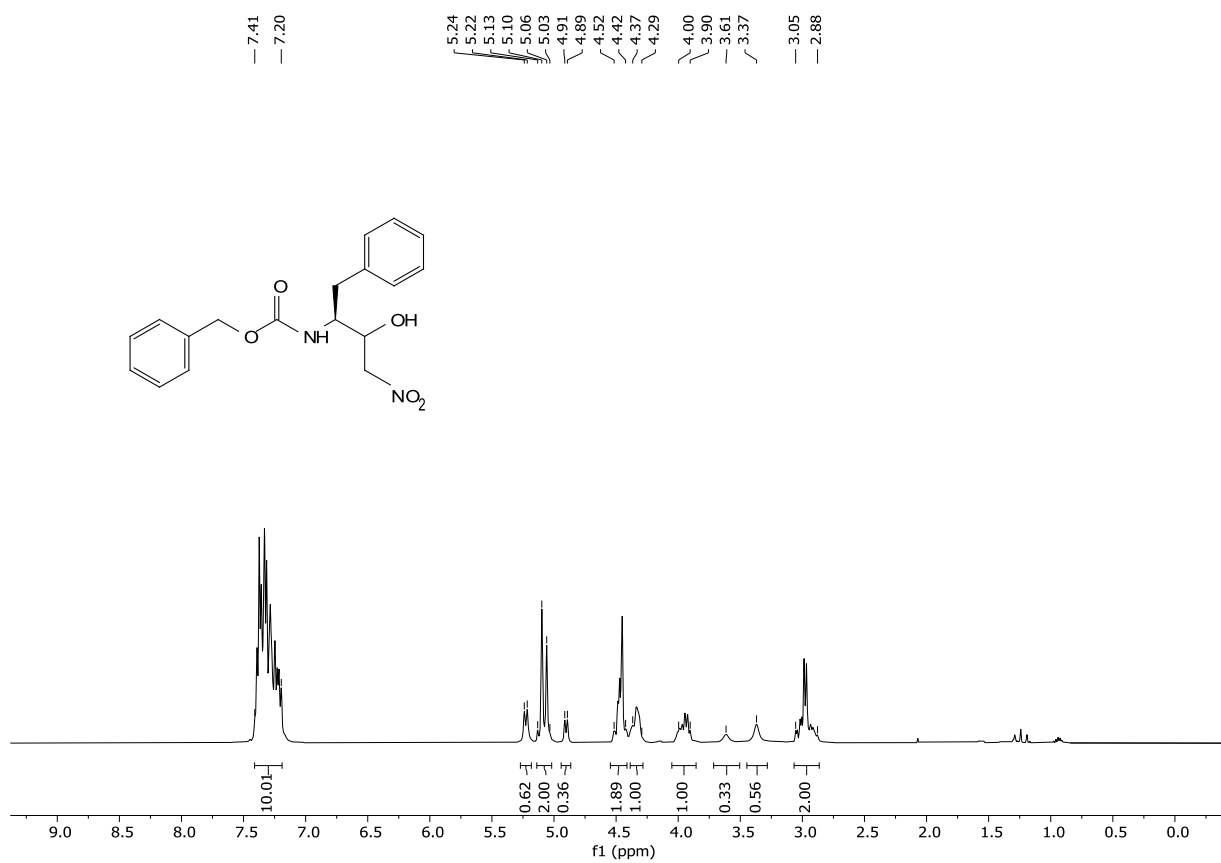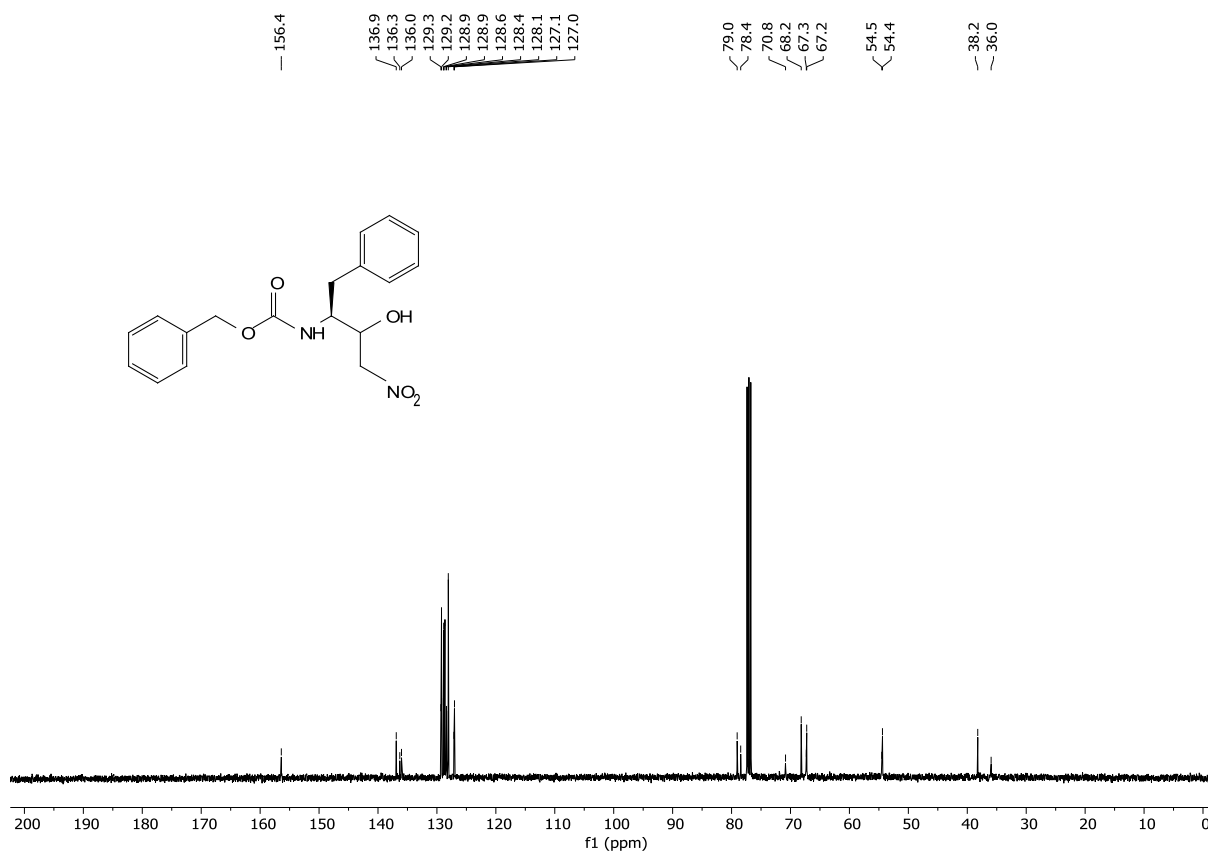

**(2c)**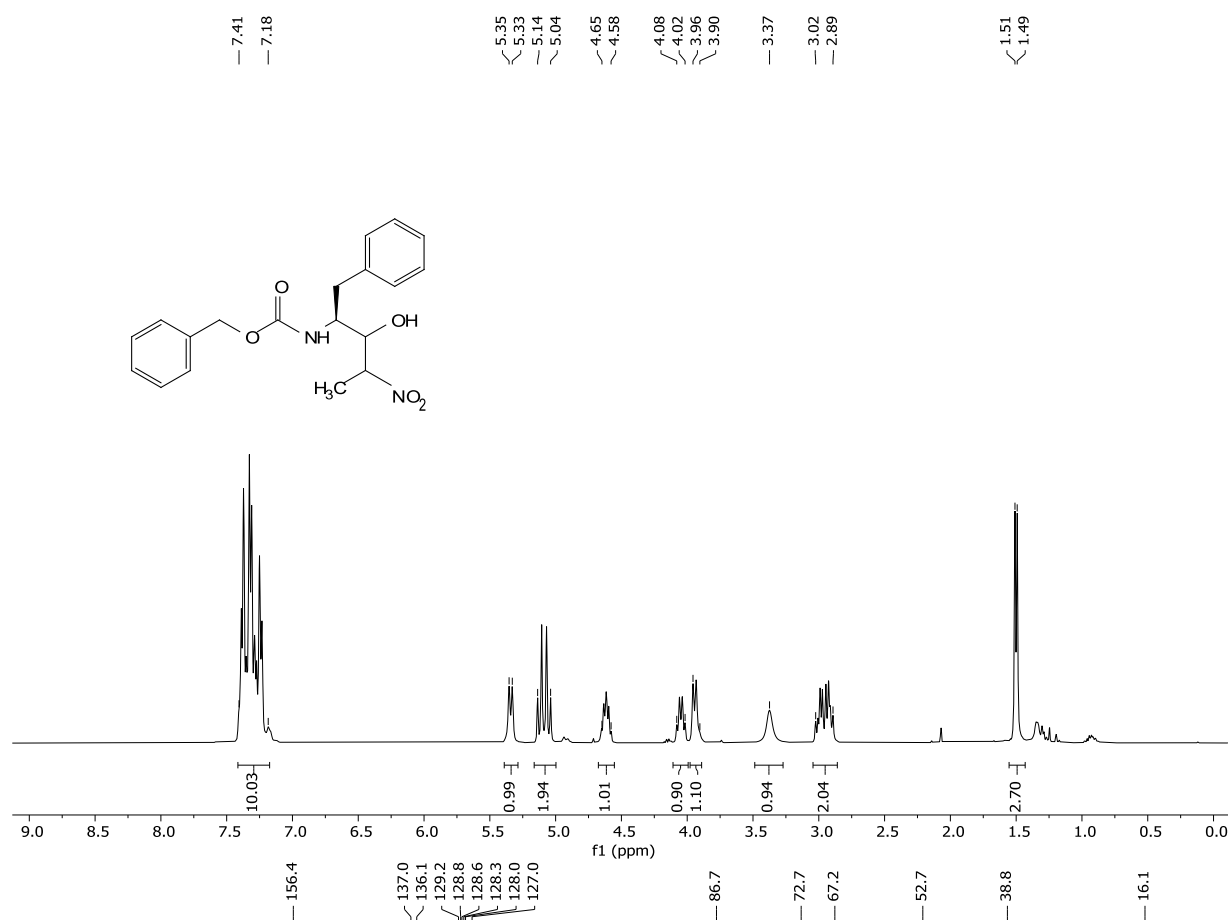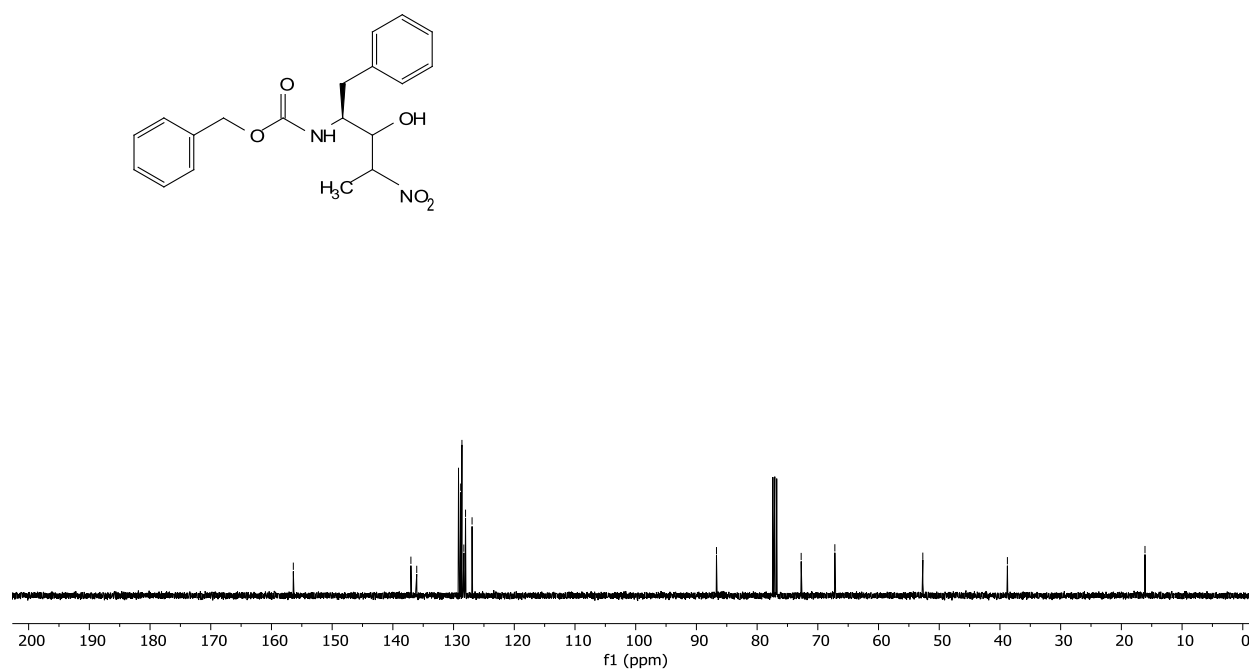

## (2d)

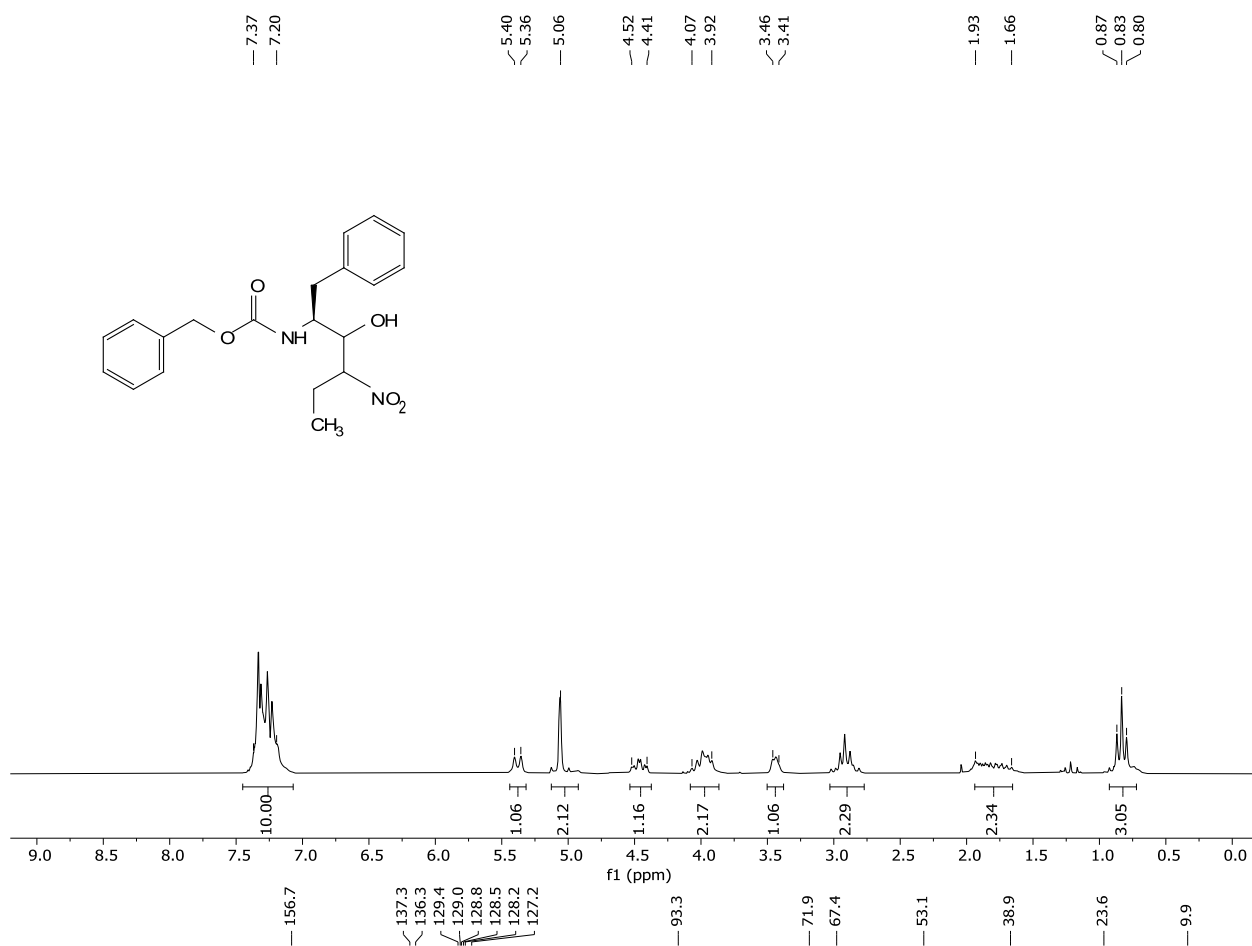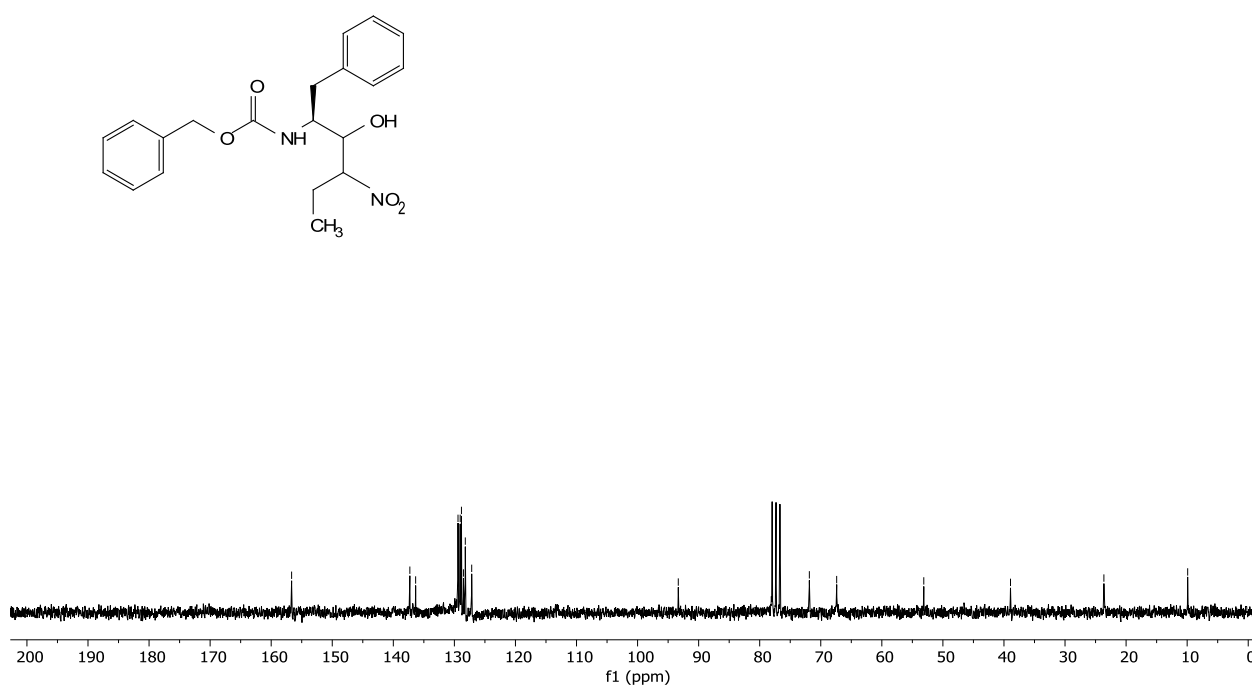

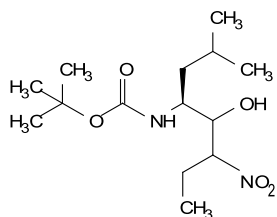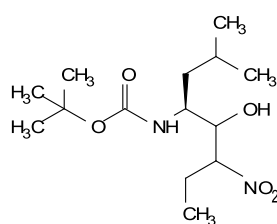

(2f)

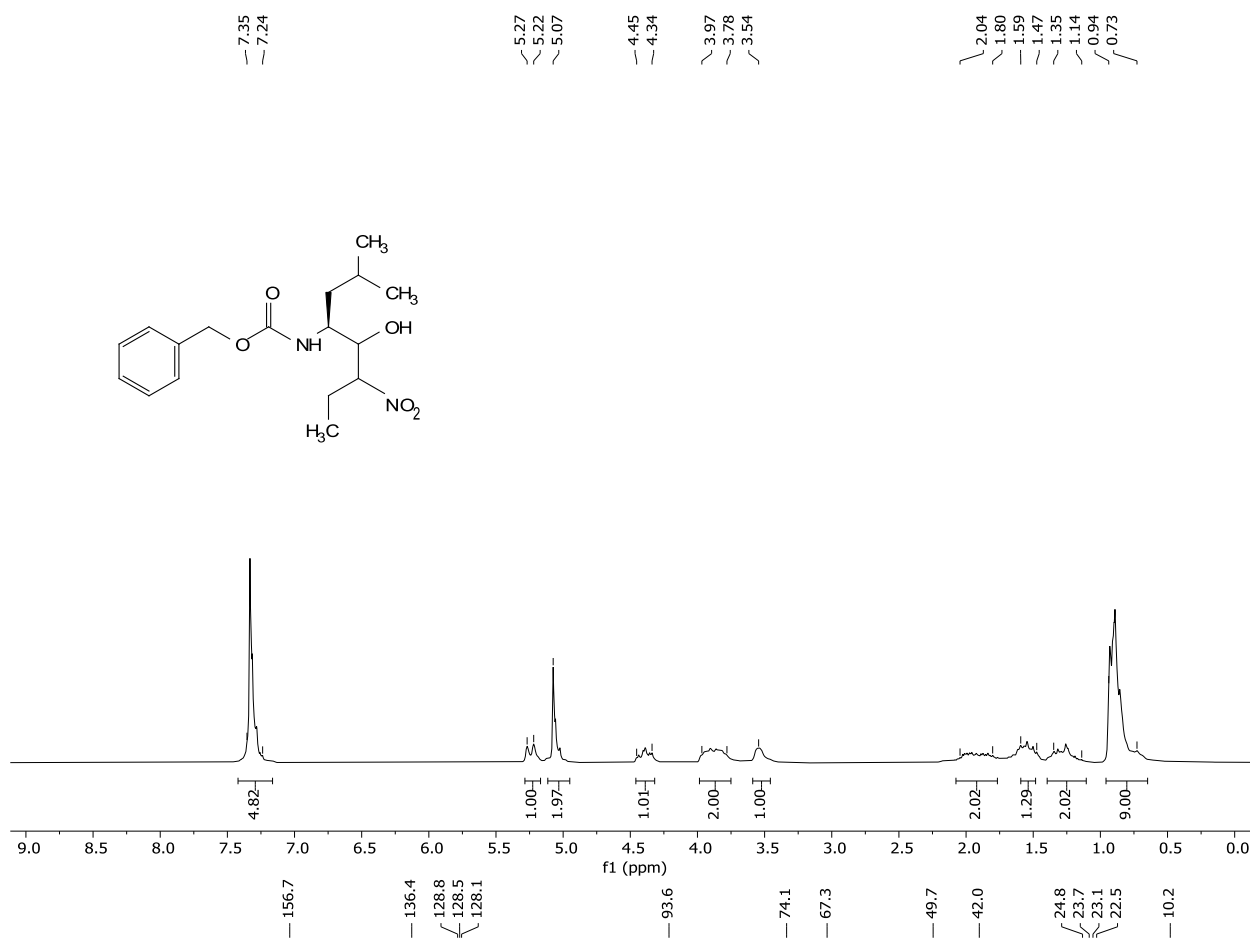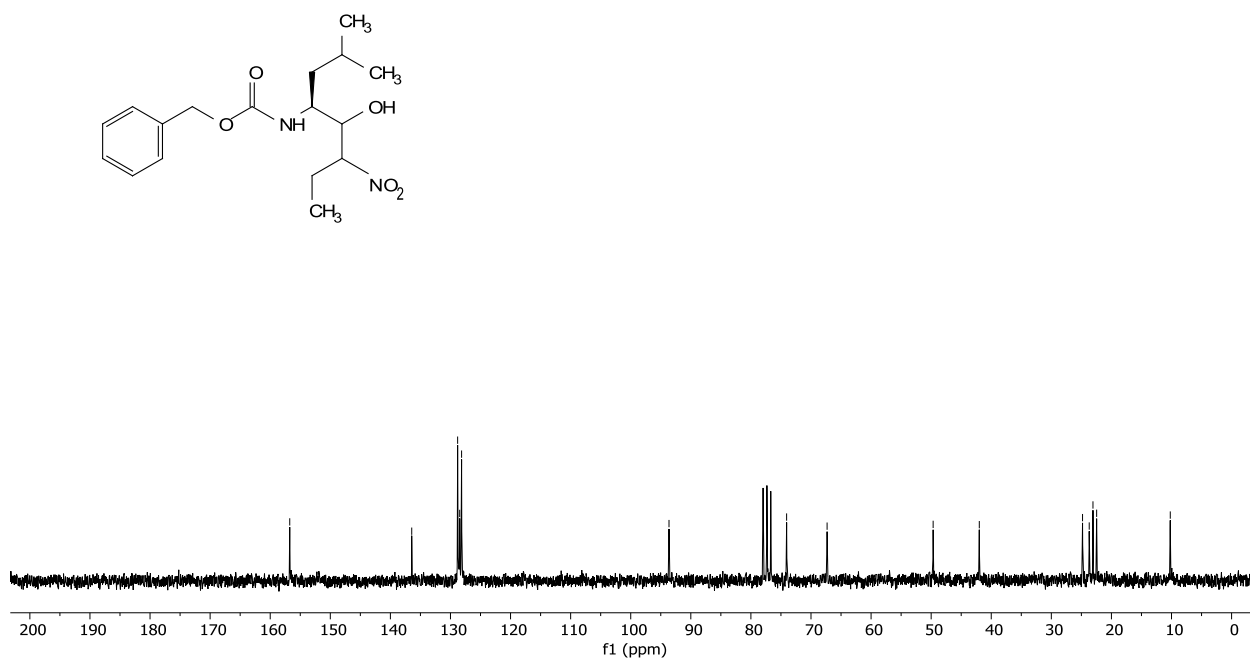



(2h)

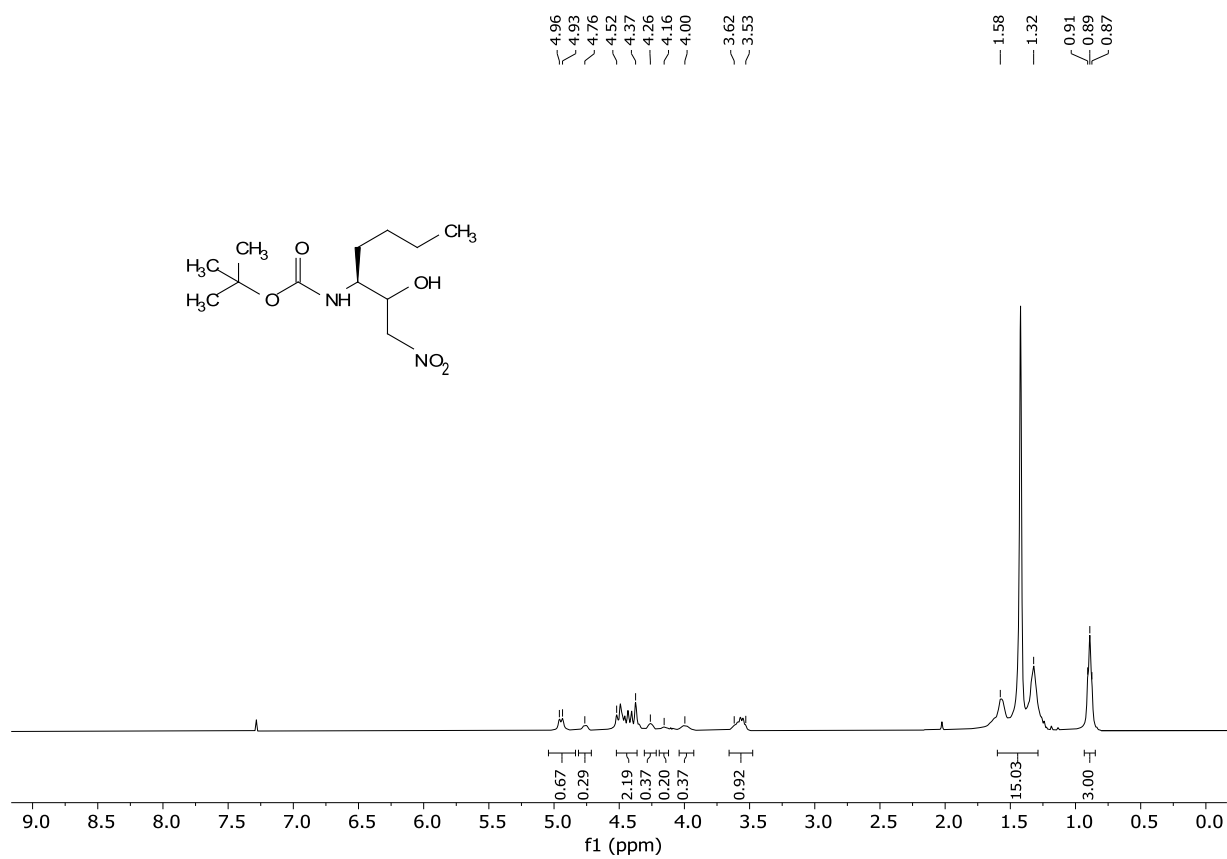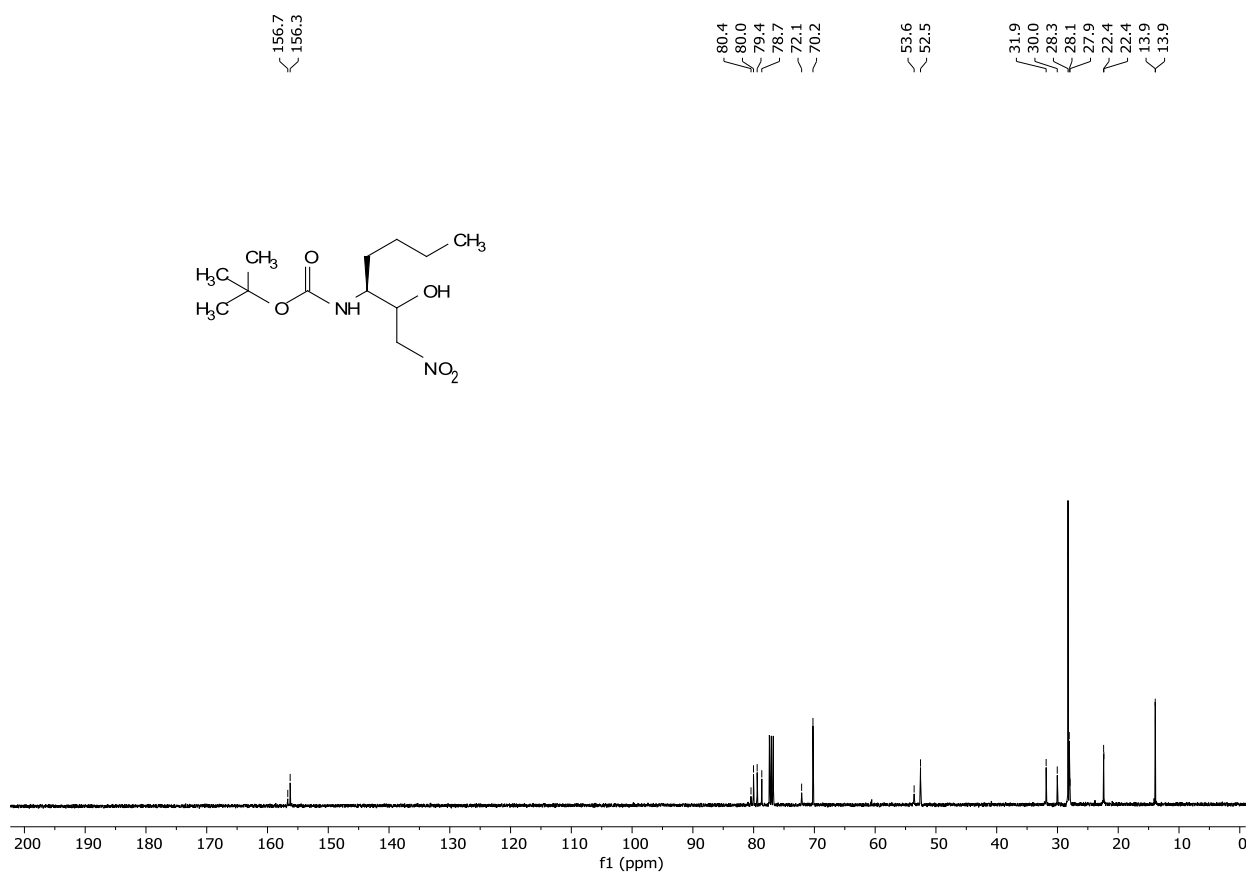

(2i)

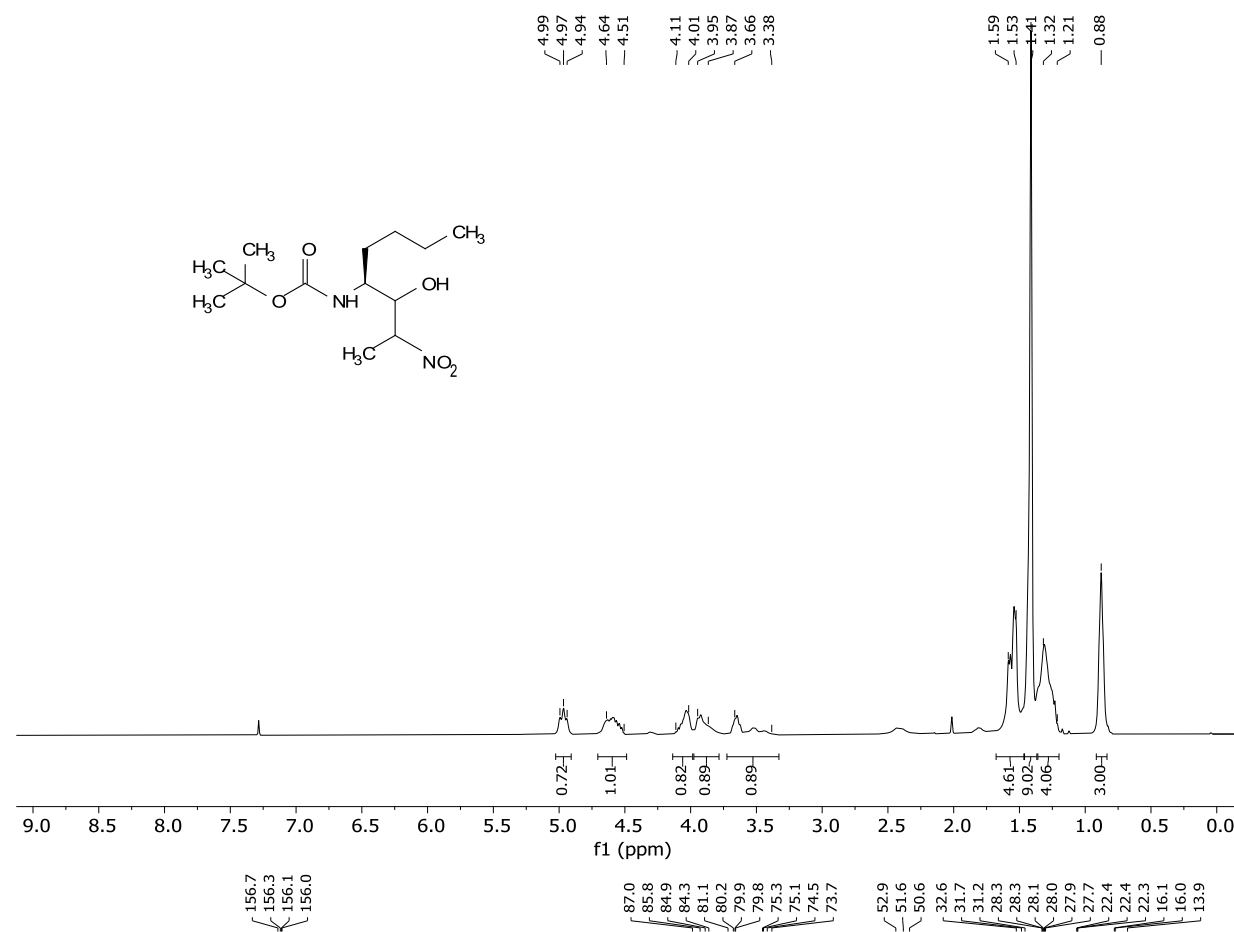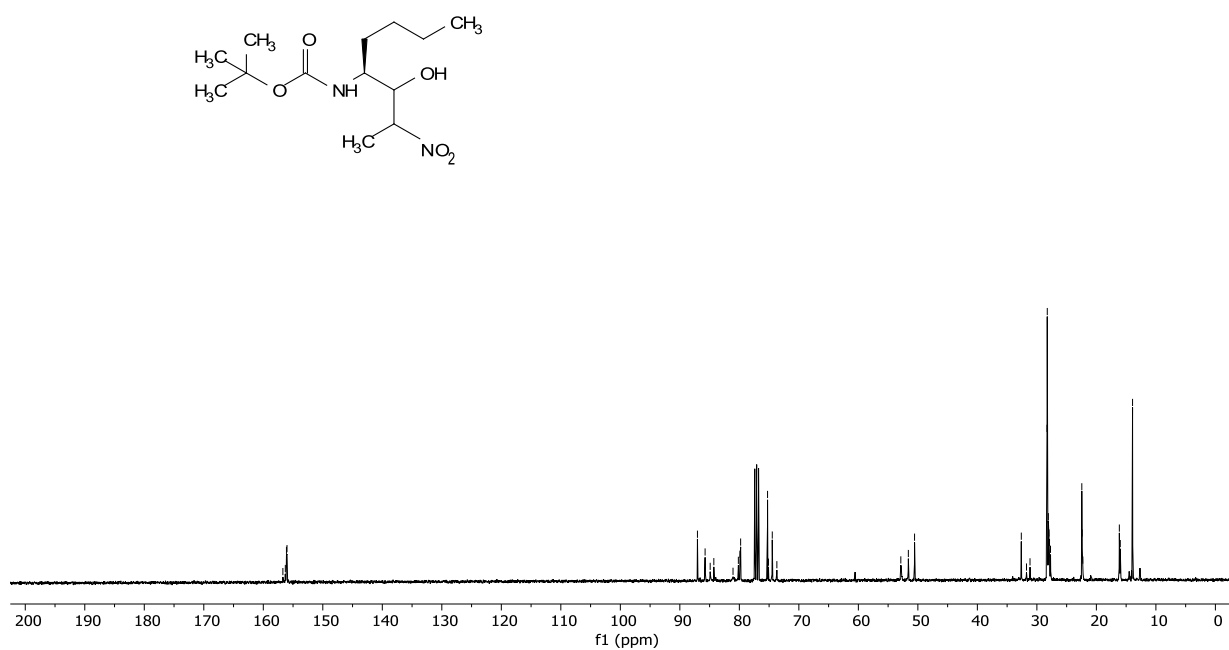

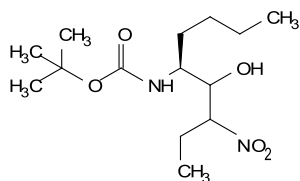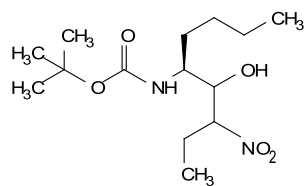

## (2k)

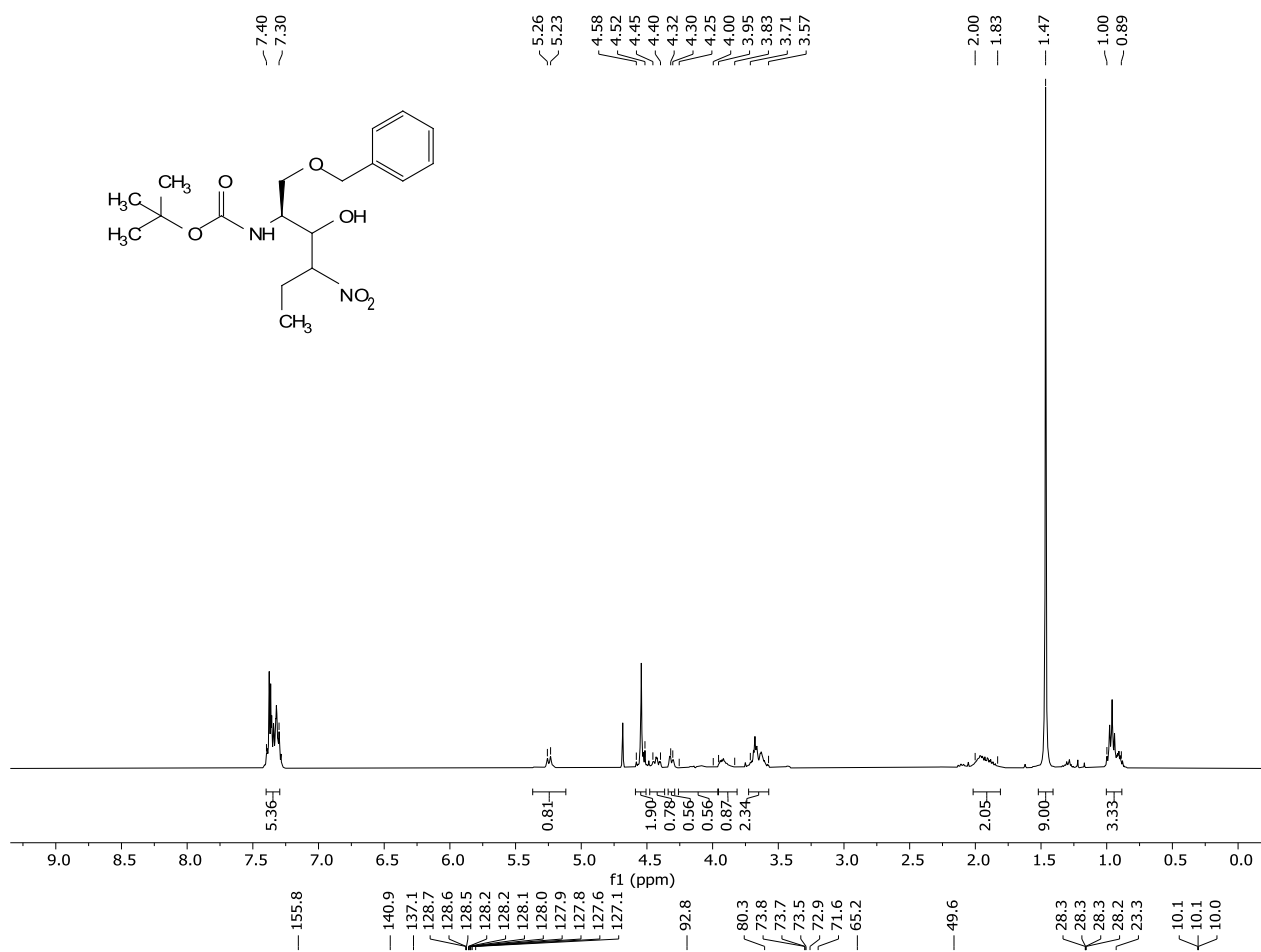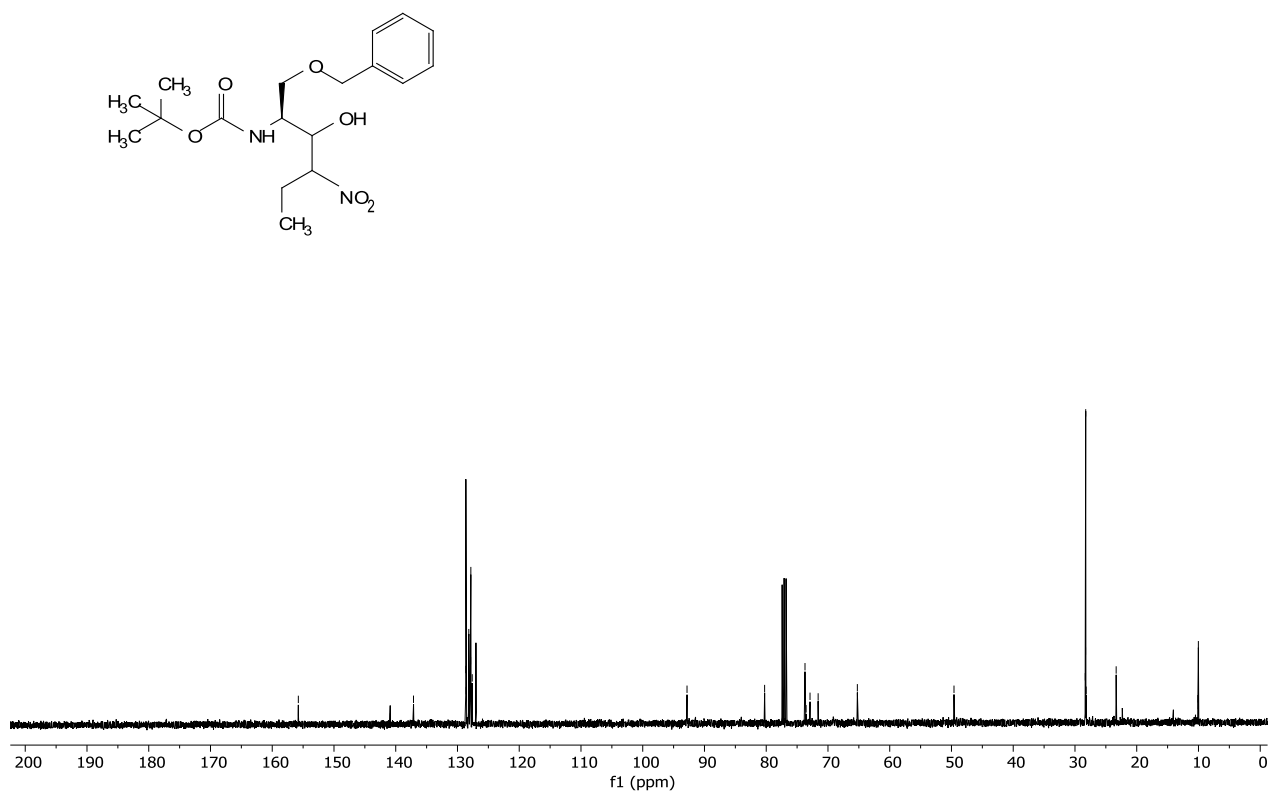

(2I)

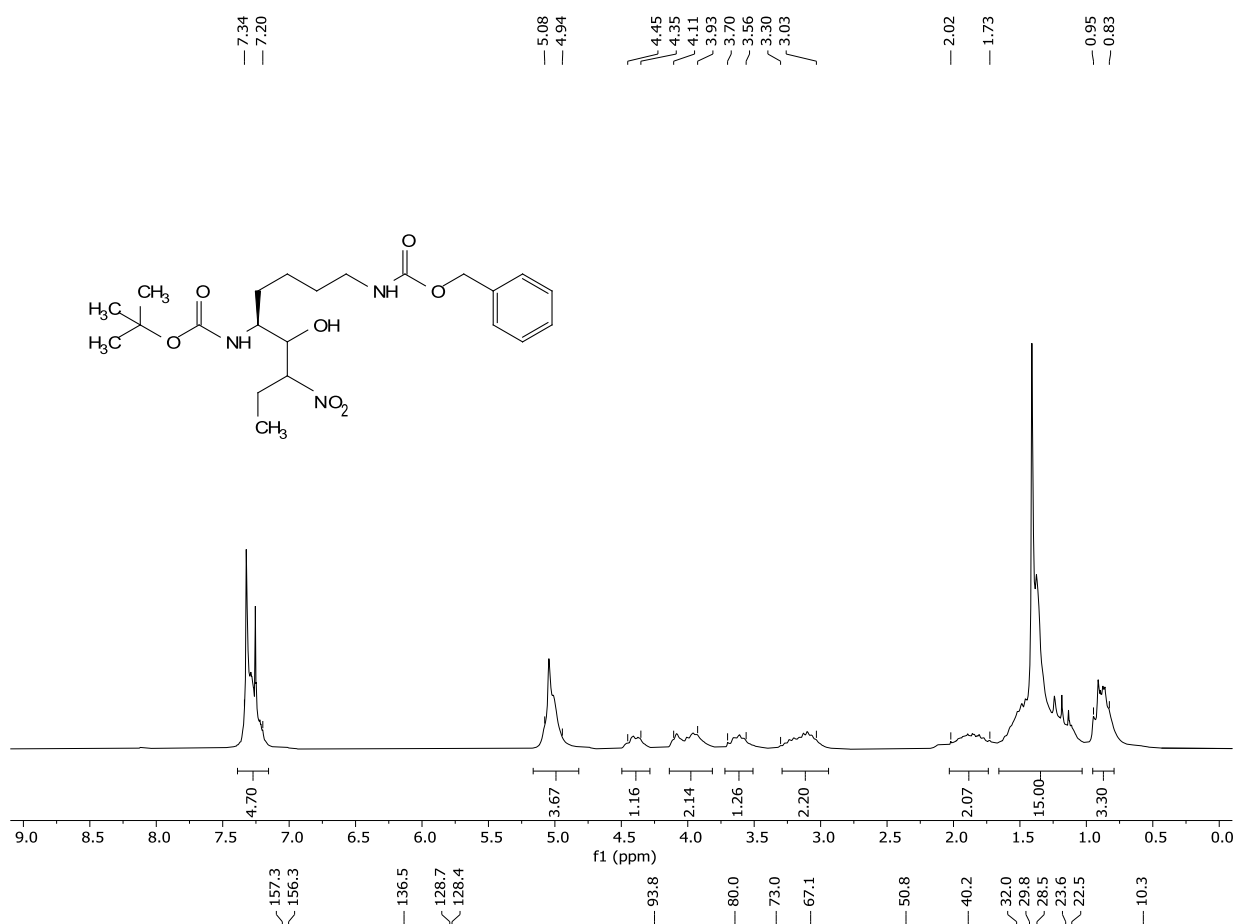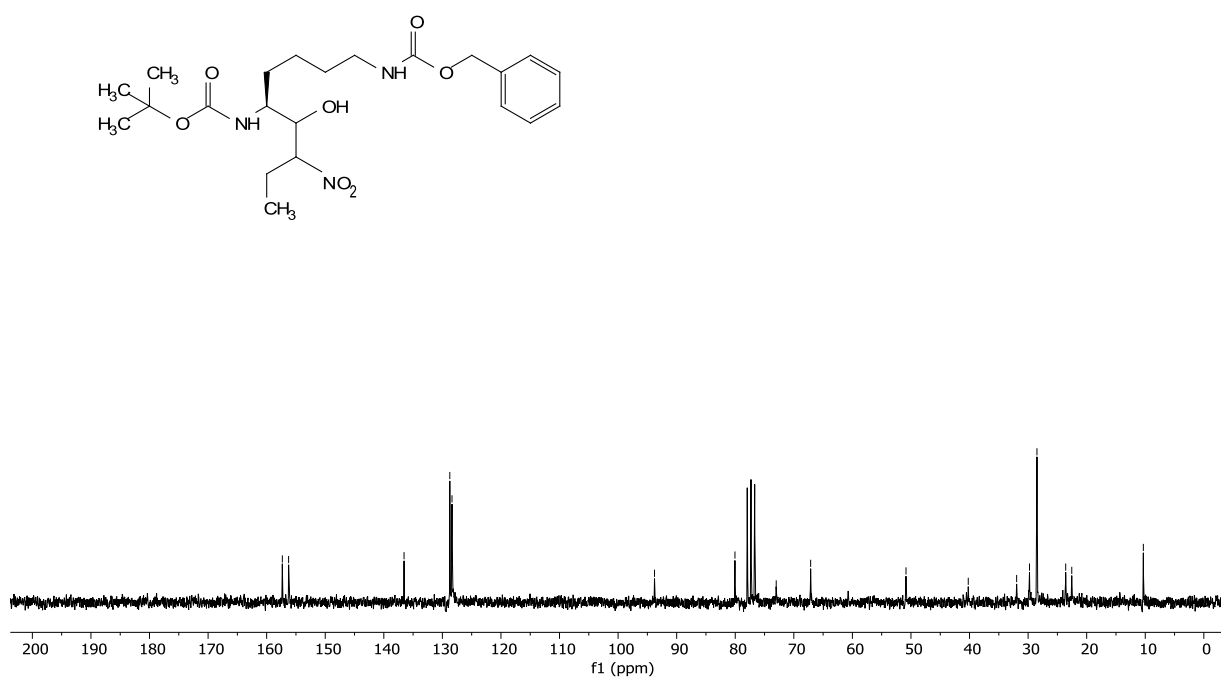

(2m)

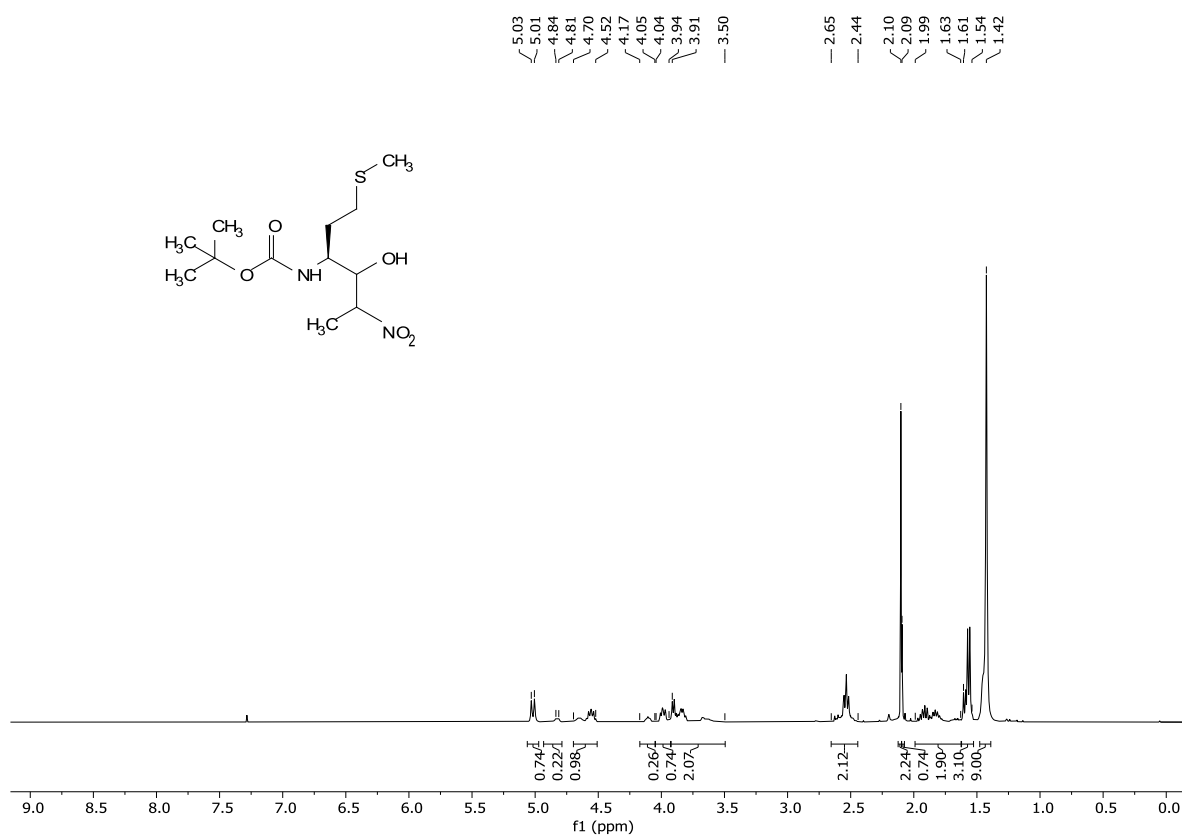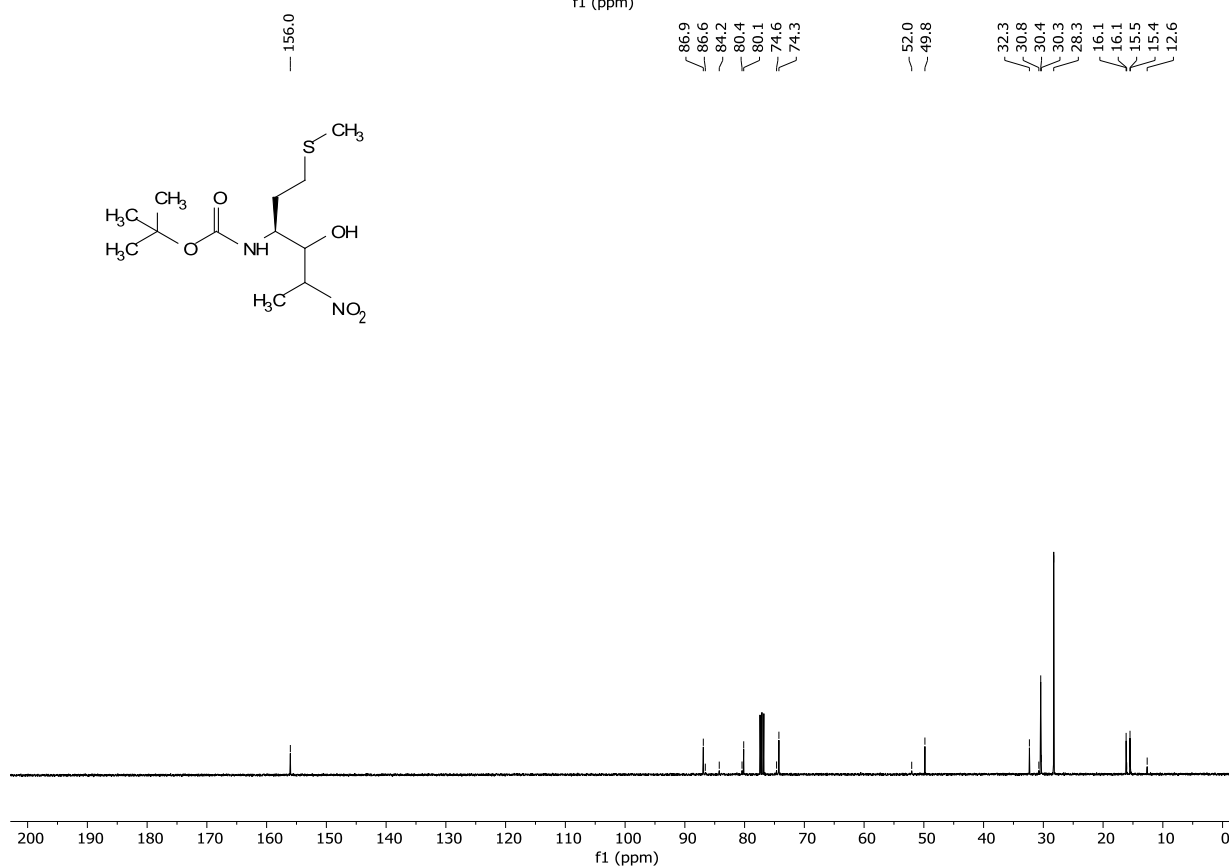

## (2n)

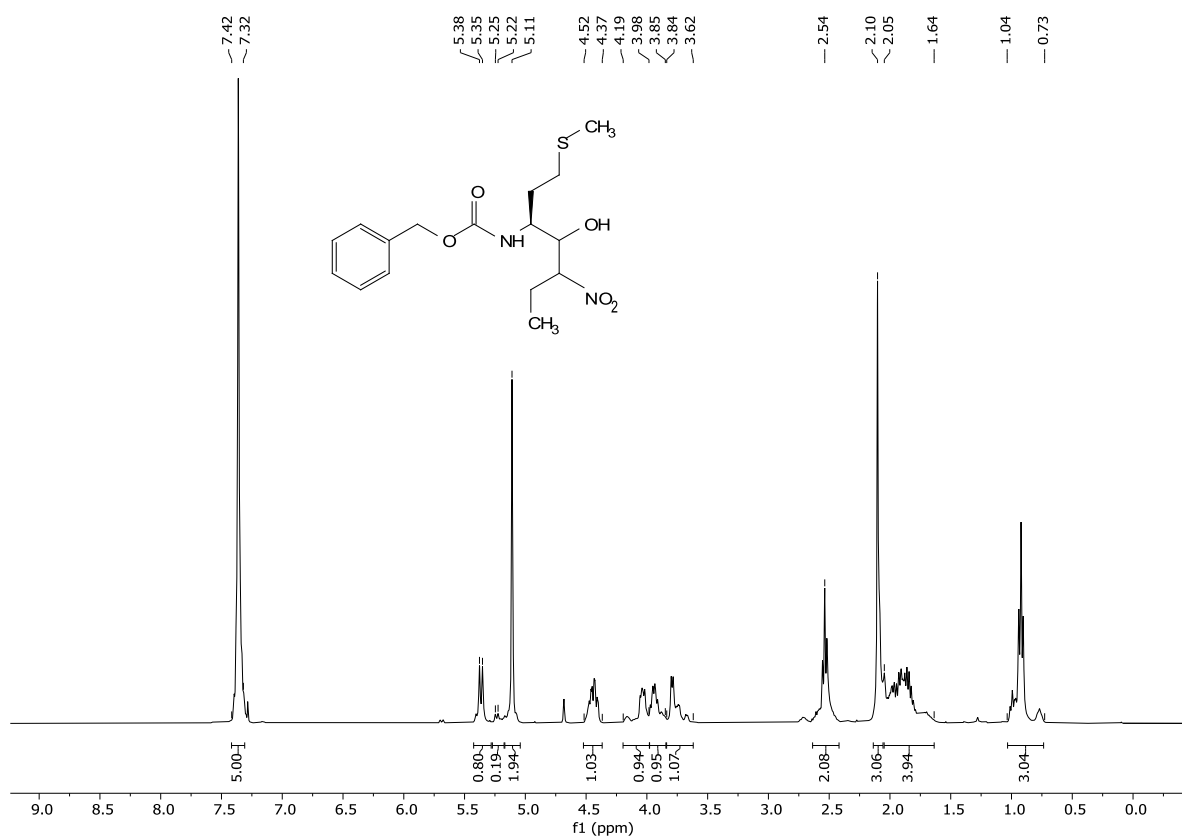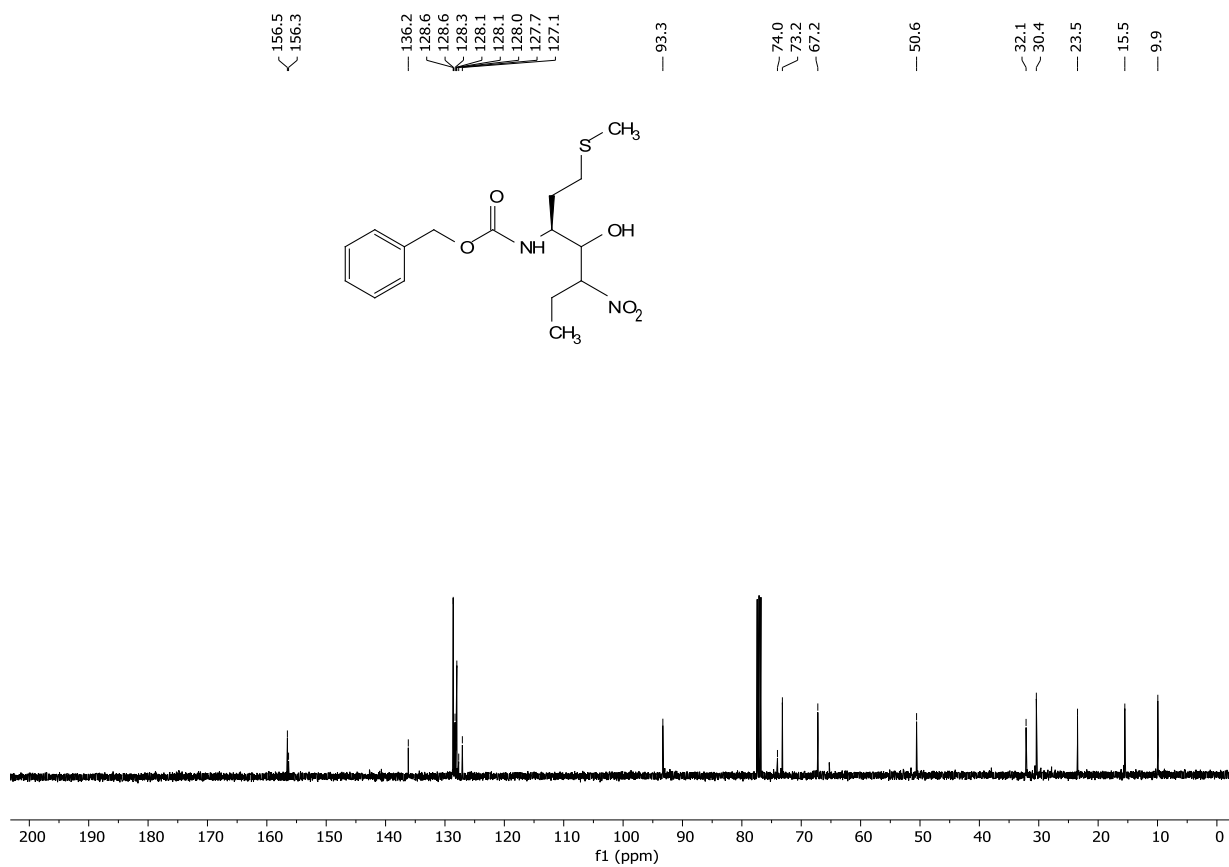

(3a)

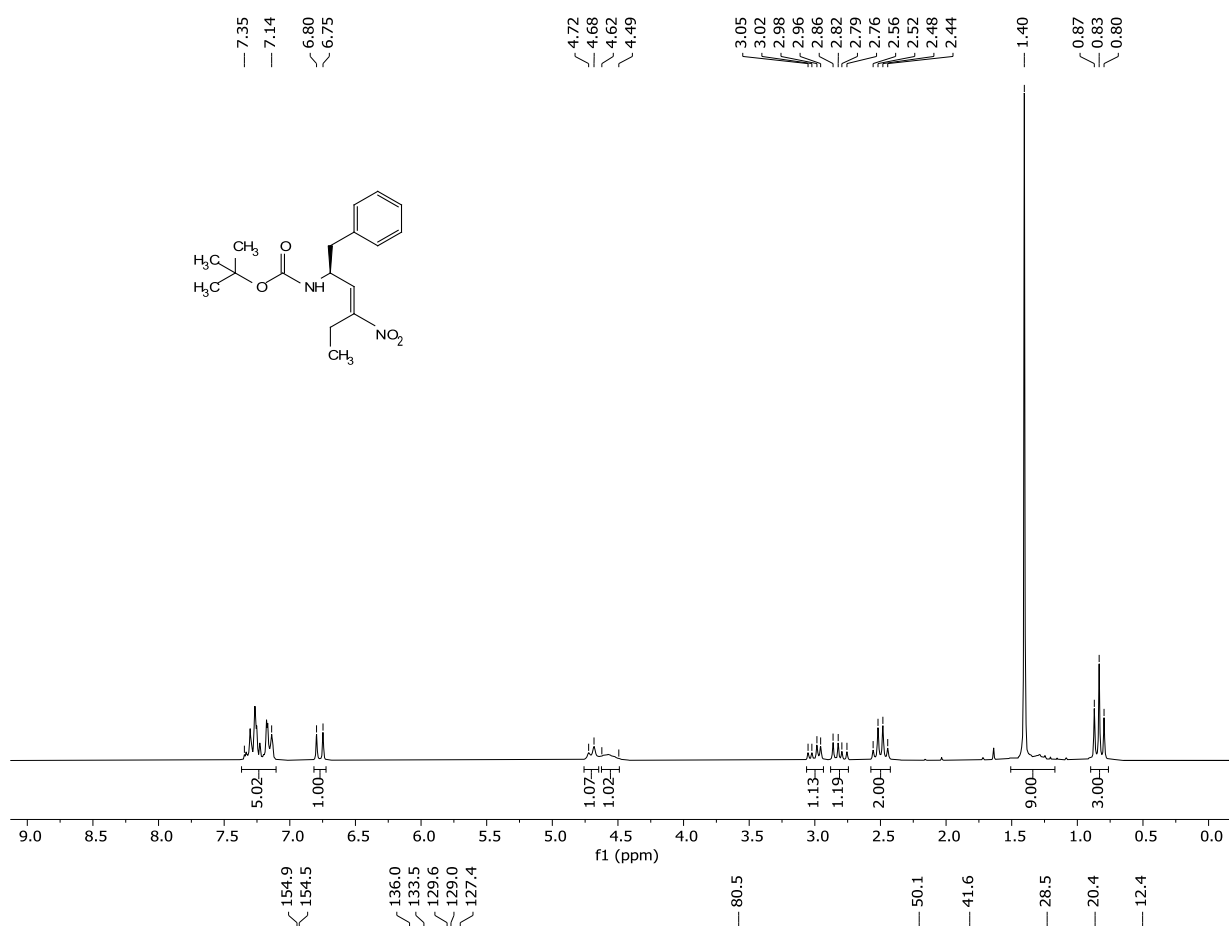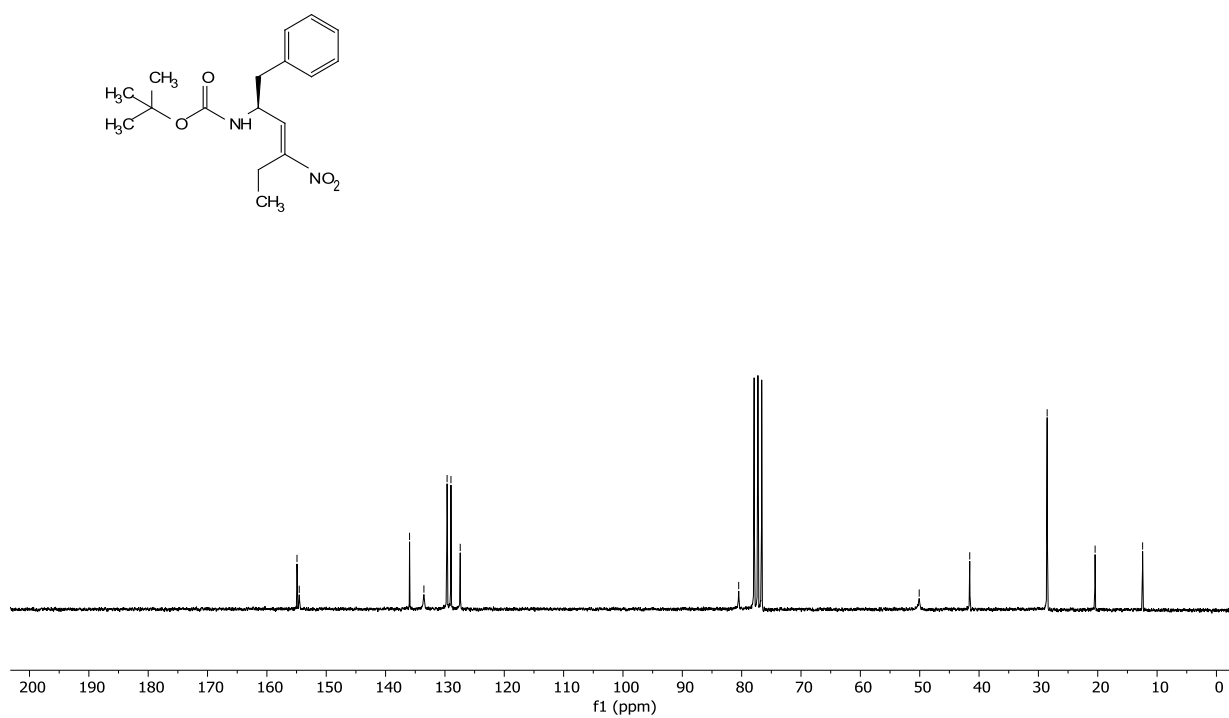



**(3b)**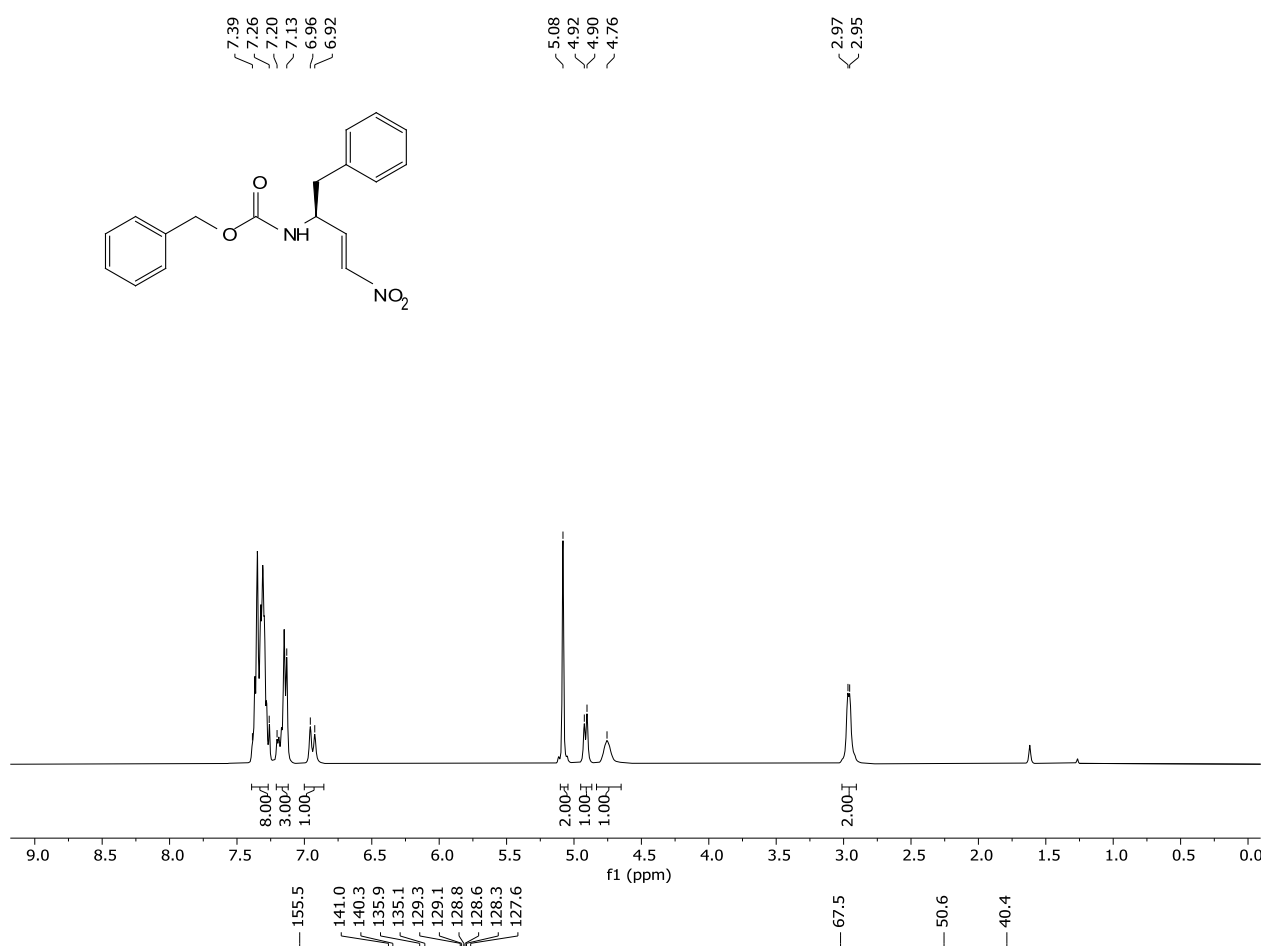

**(3c)**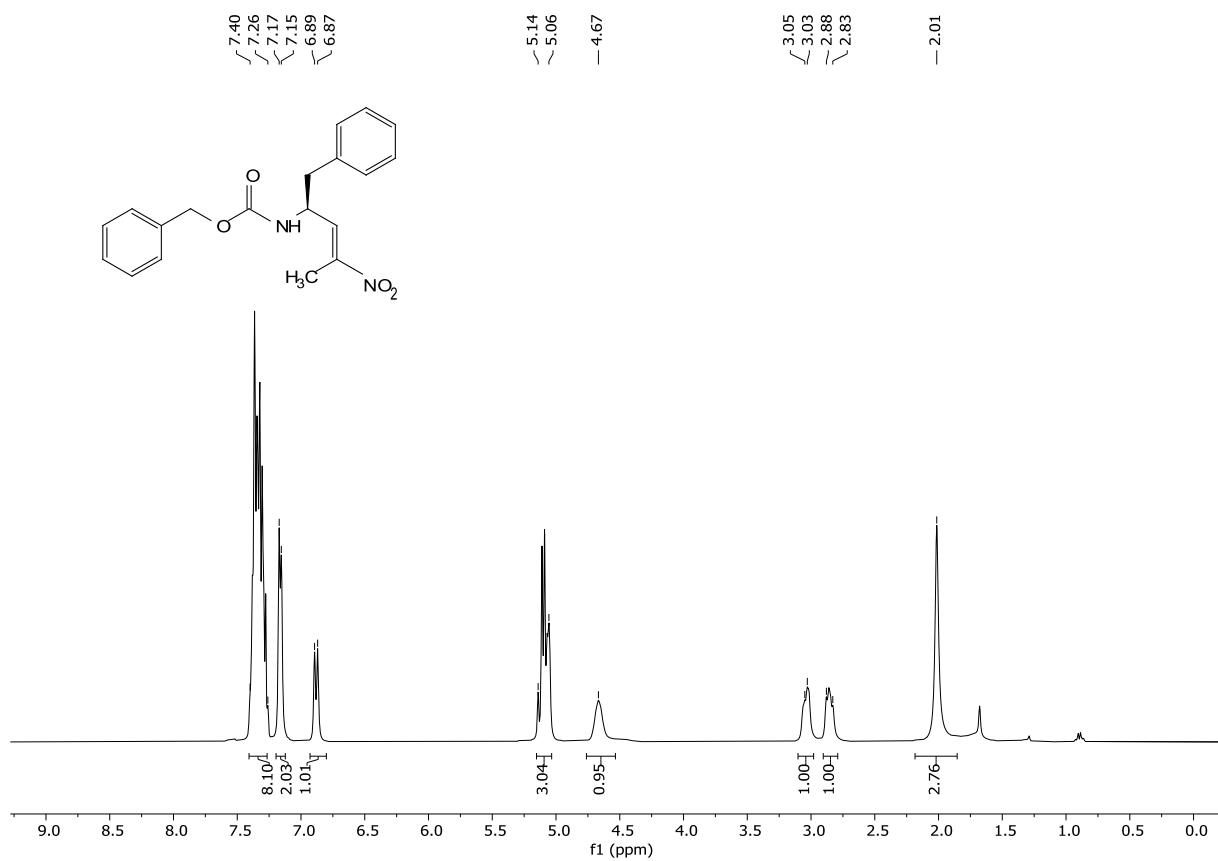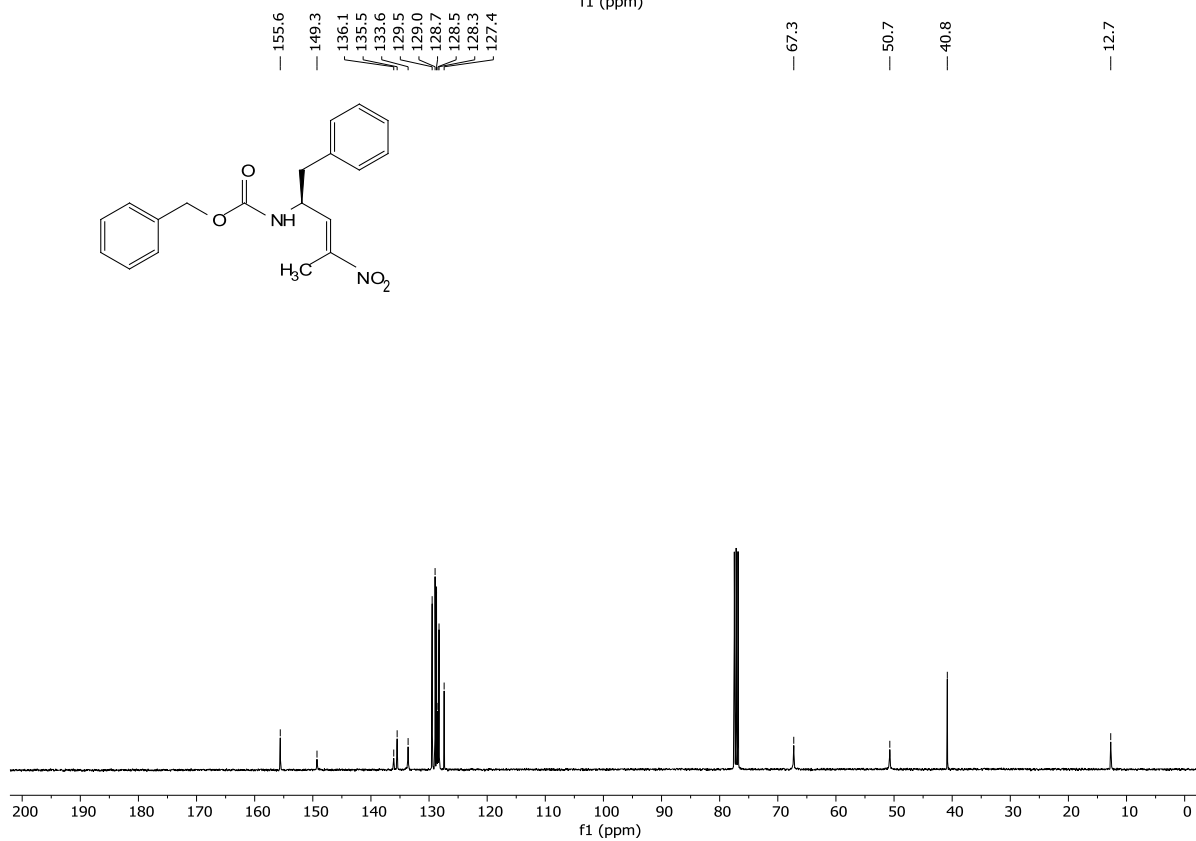

## (3d)

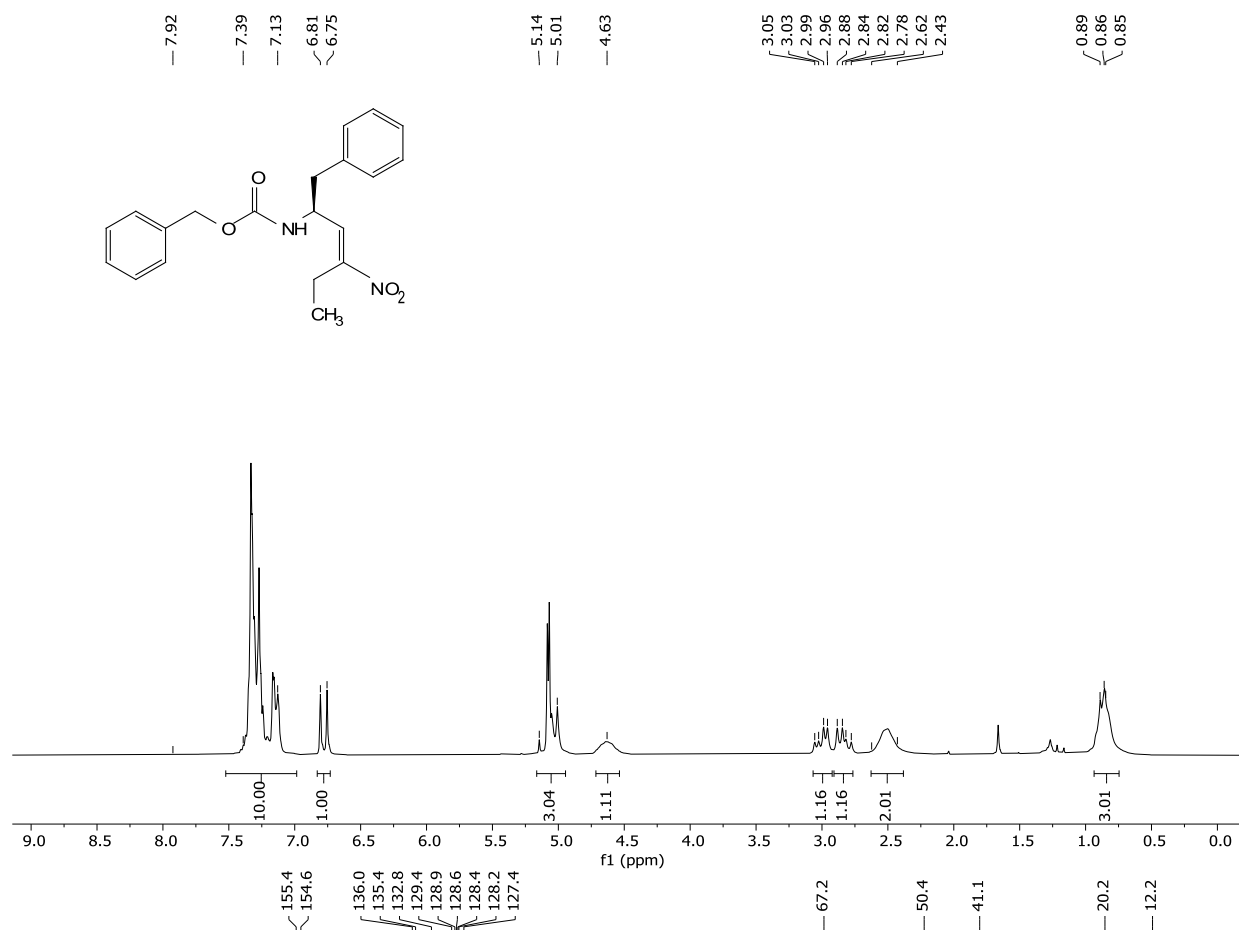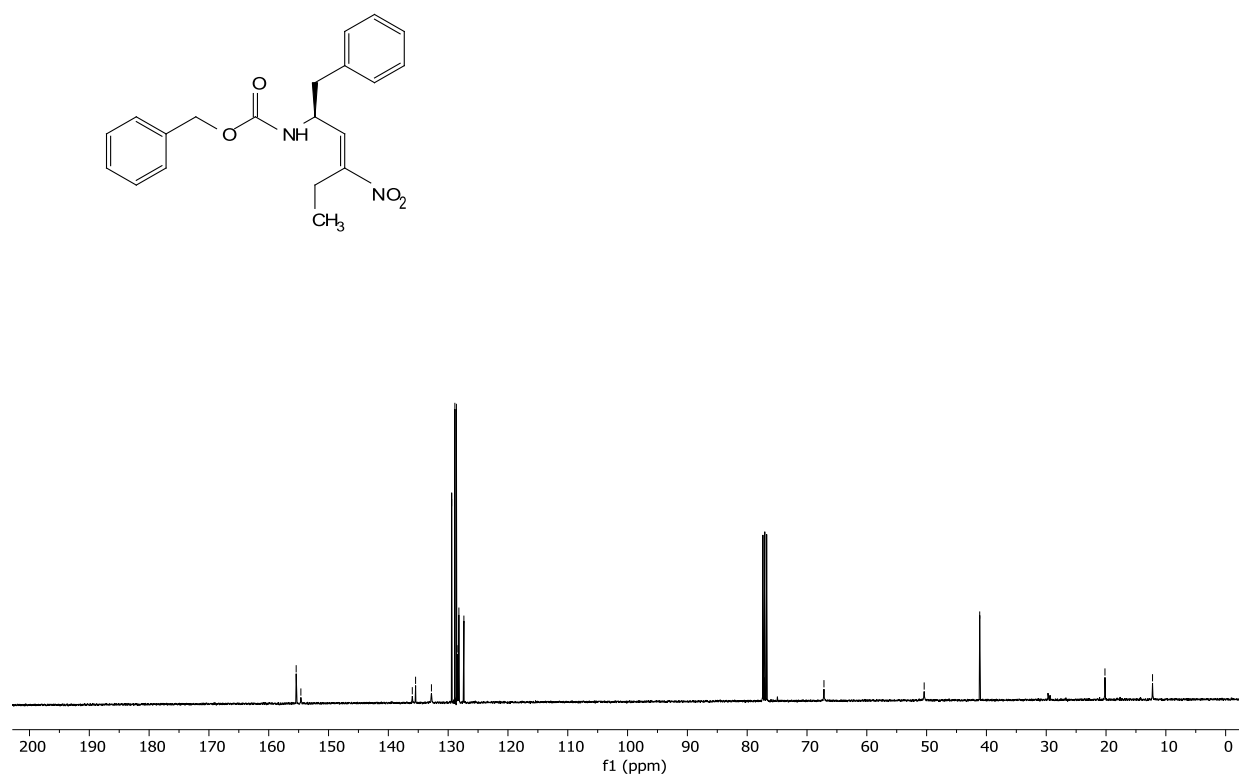

(3e)

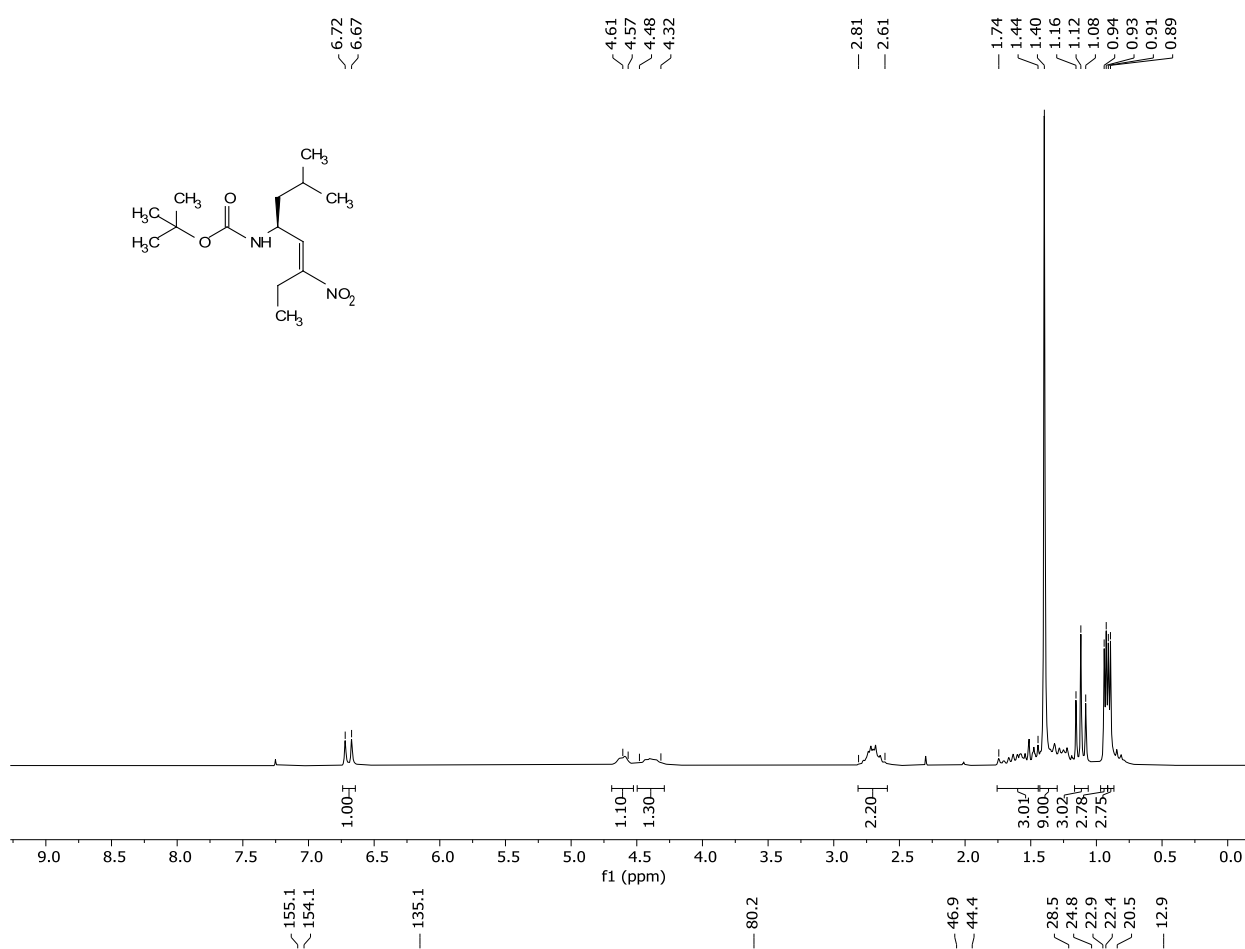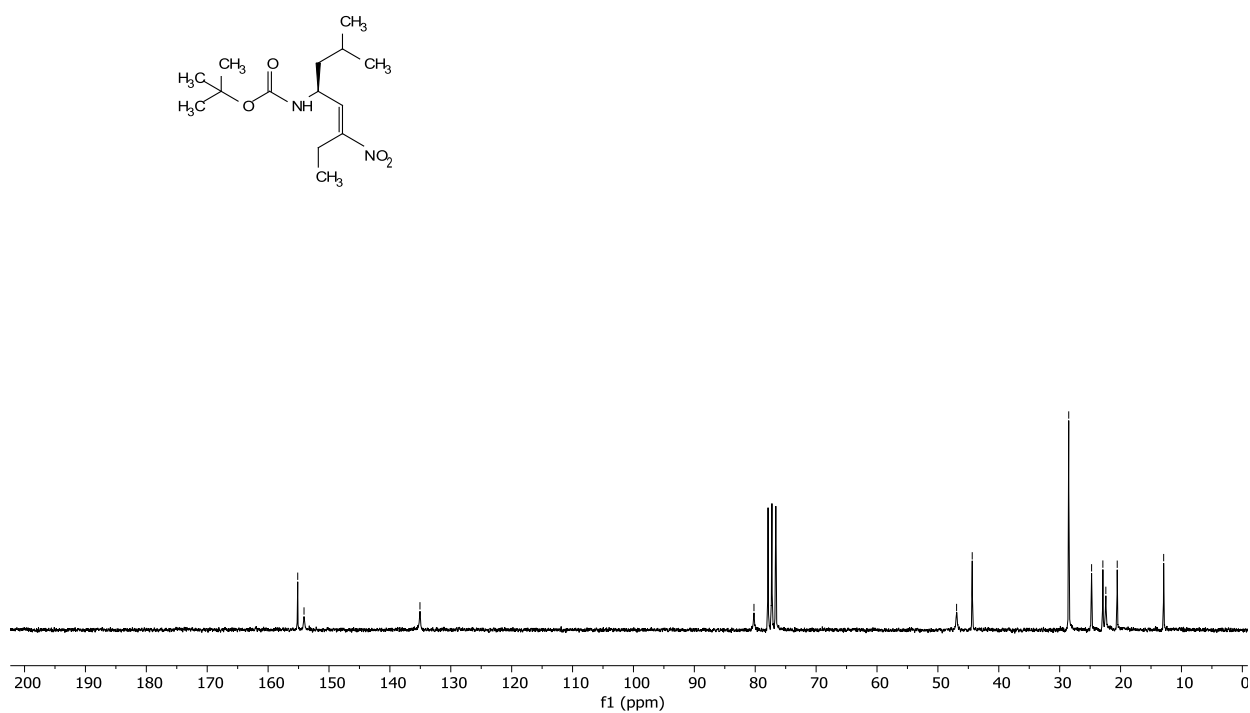

**(3f)**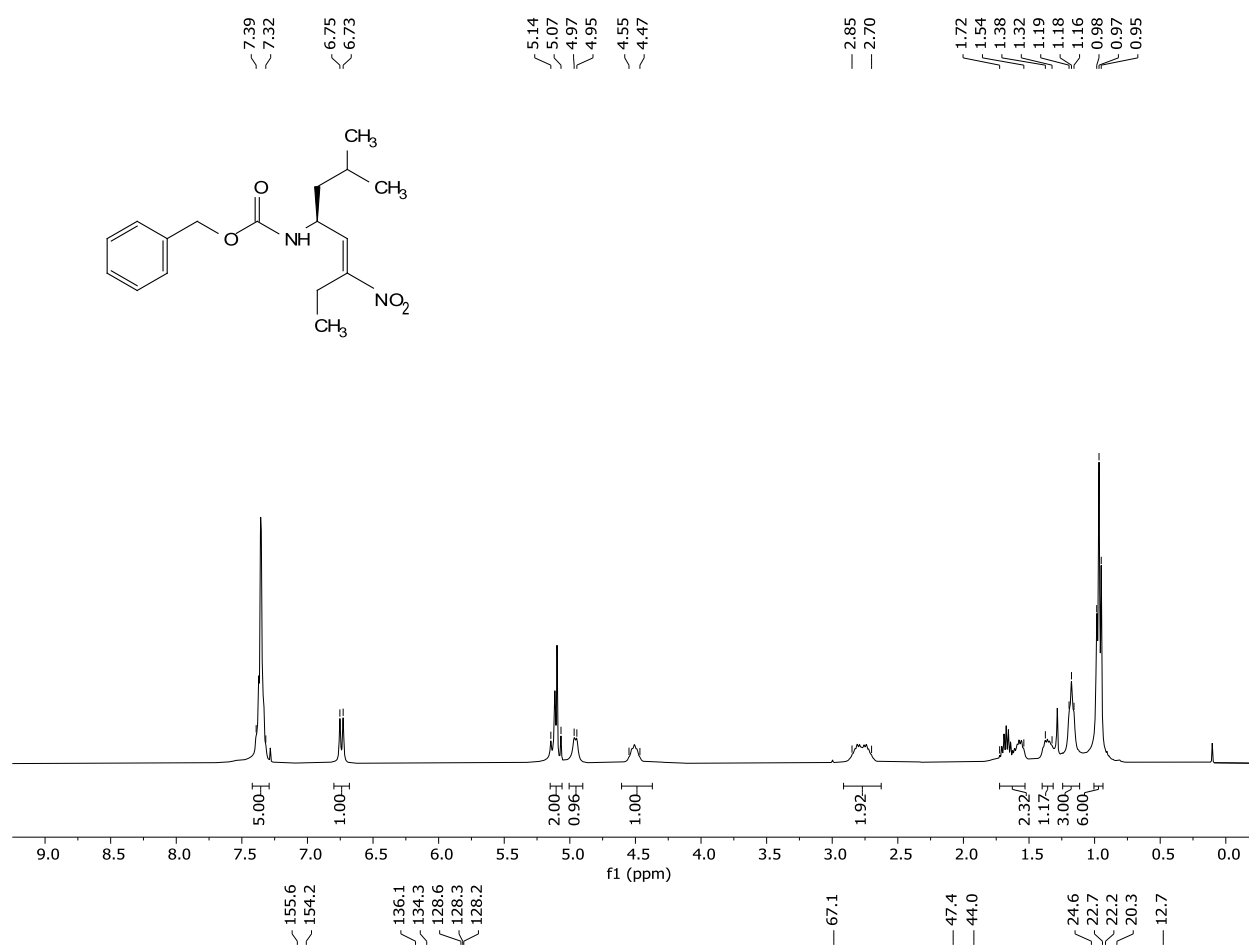

**(3g)**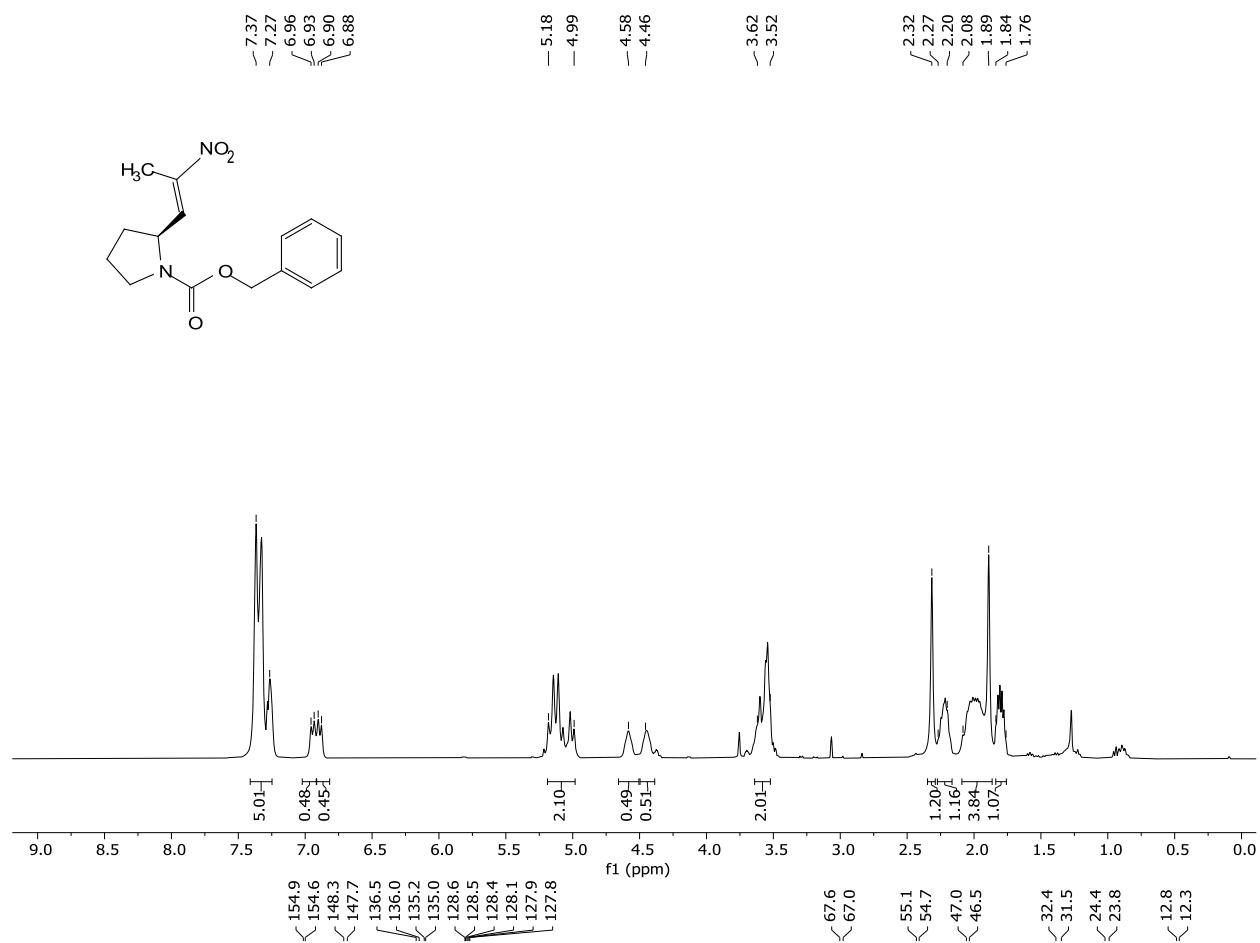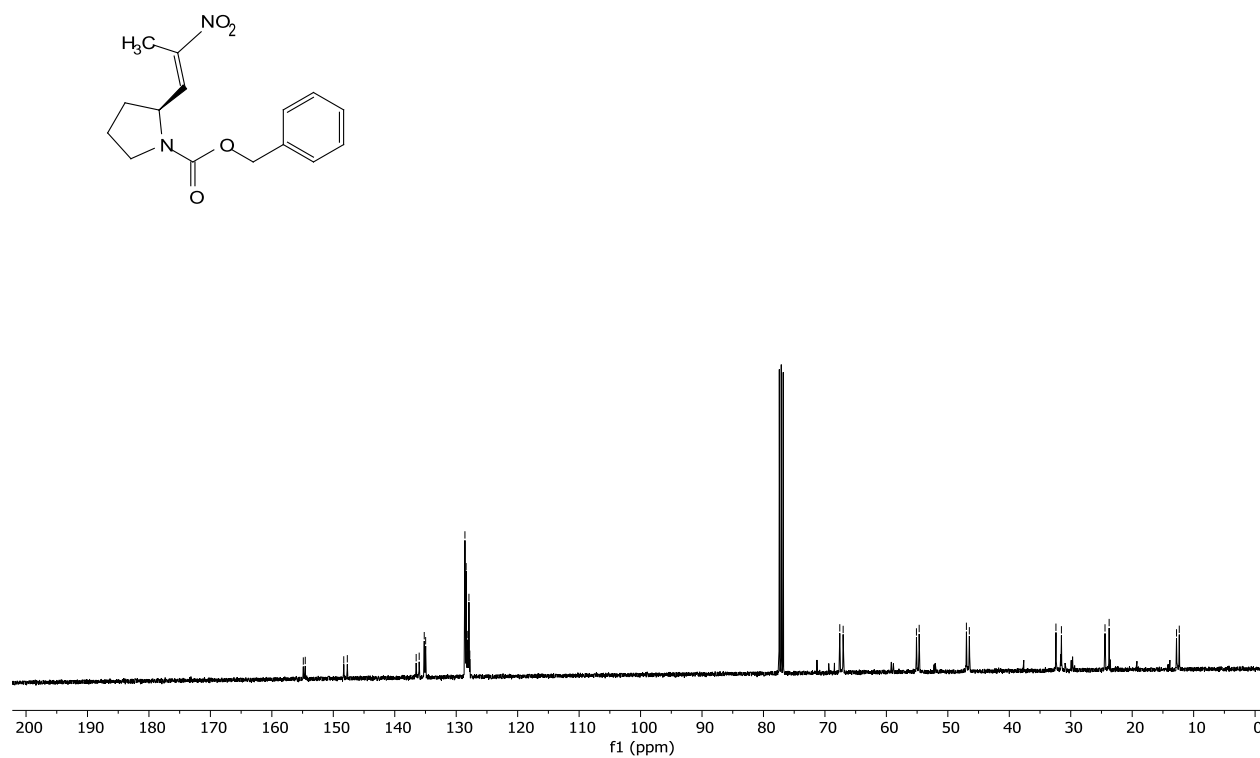

(3h)

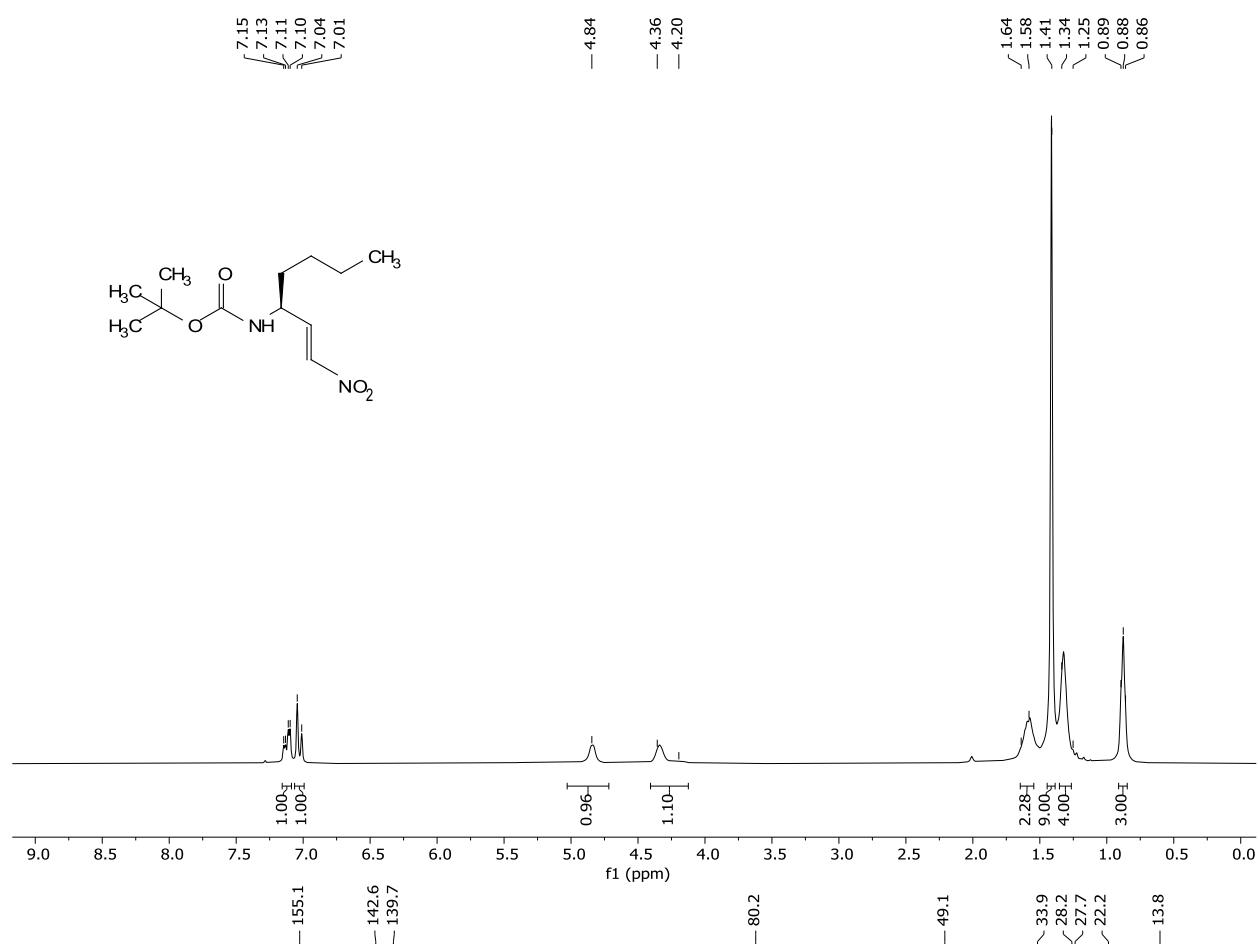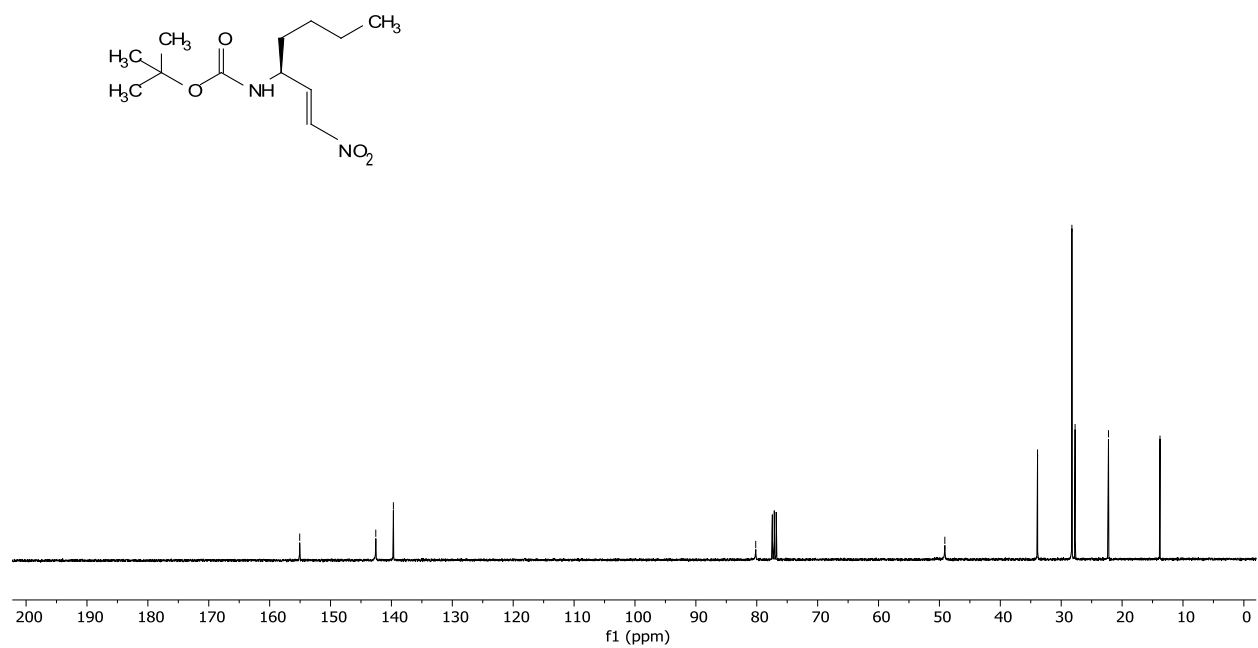

(3i)

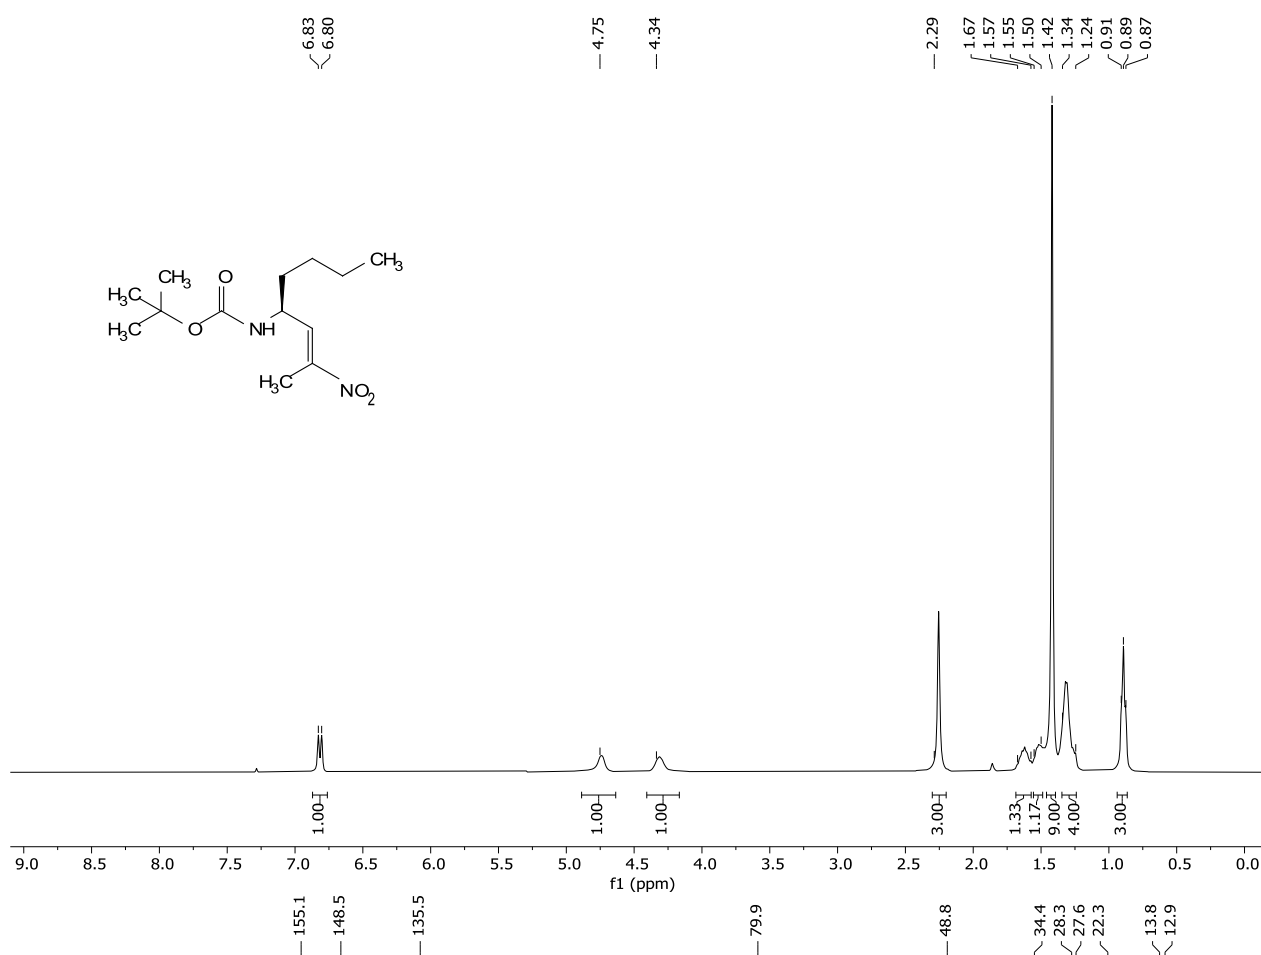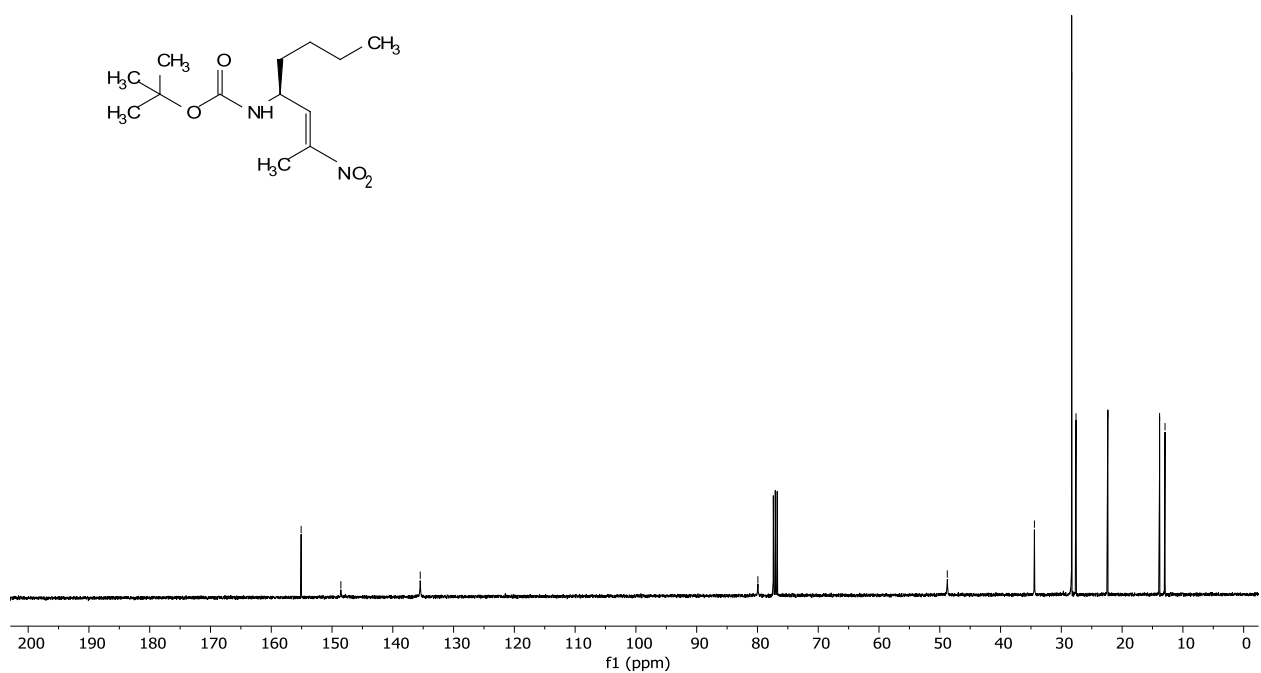



(3j)

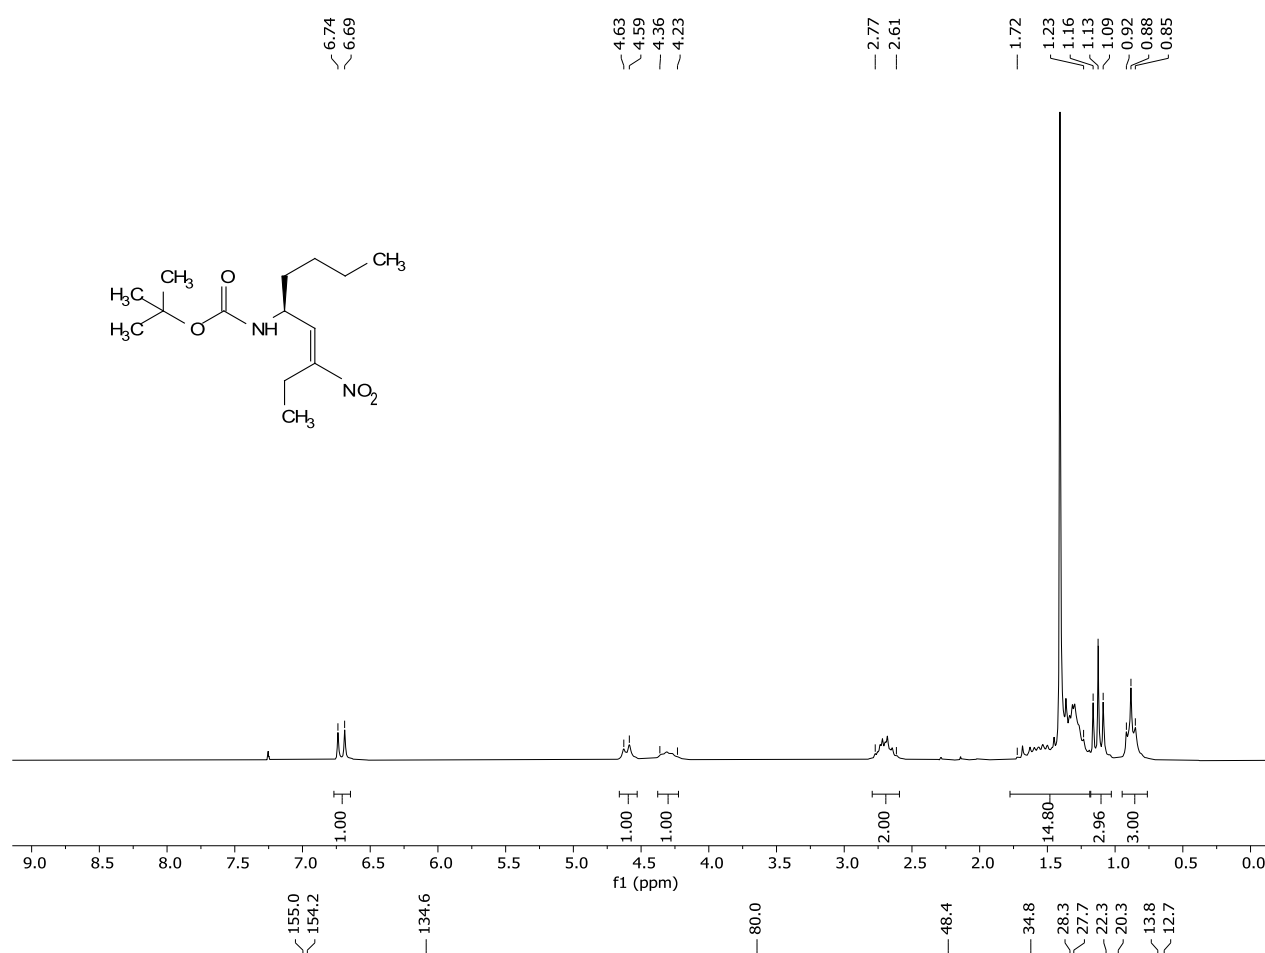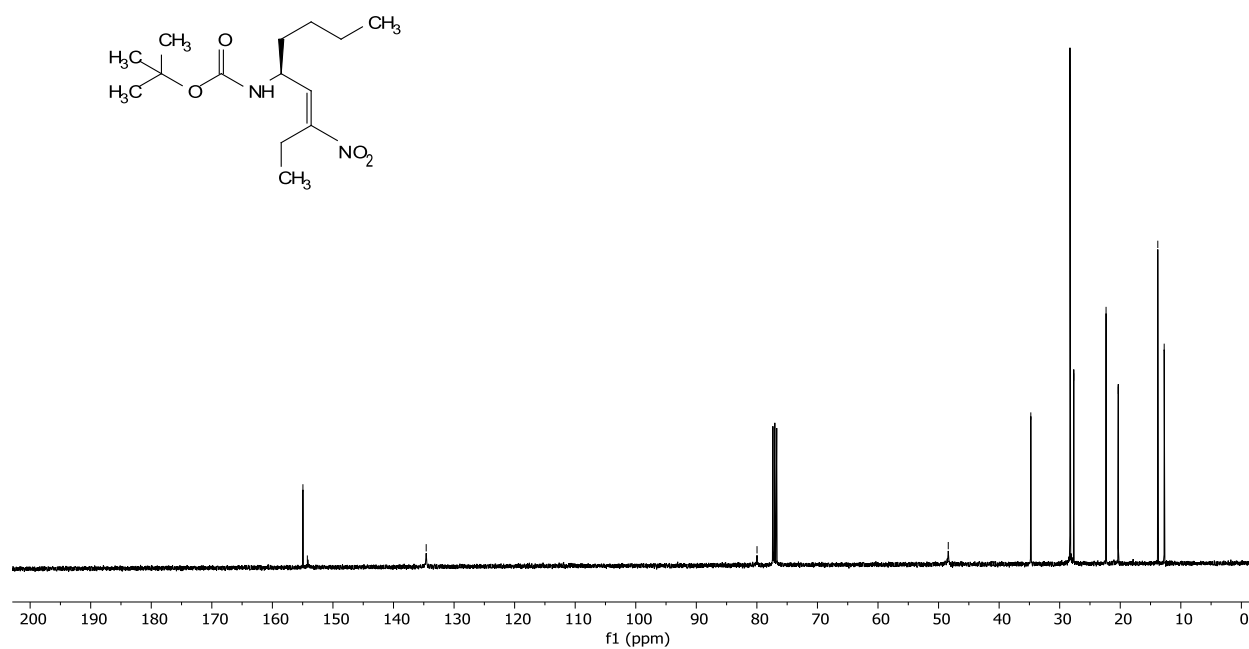

**(3k)**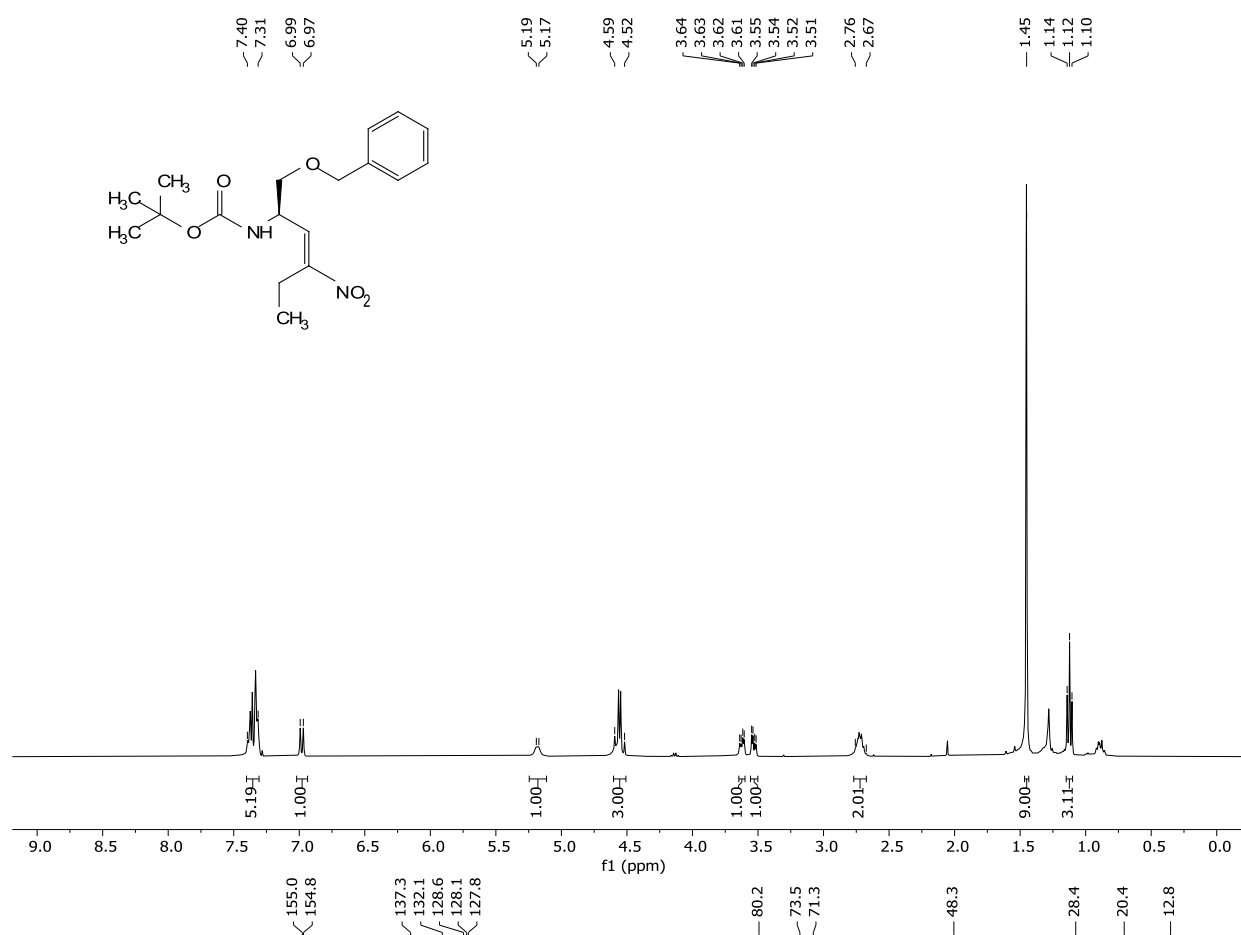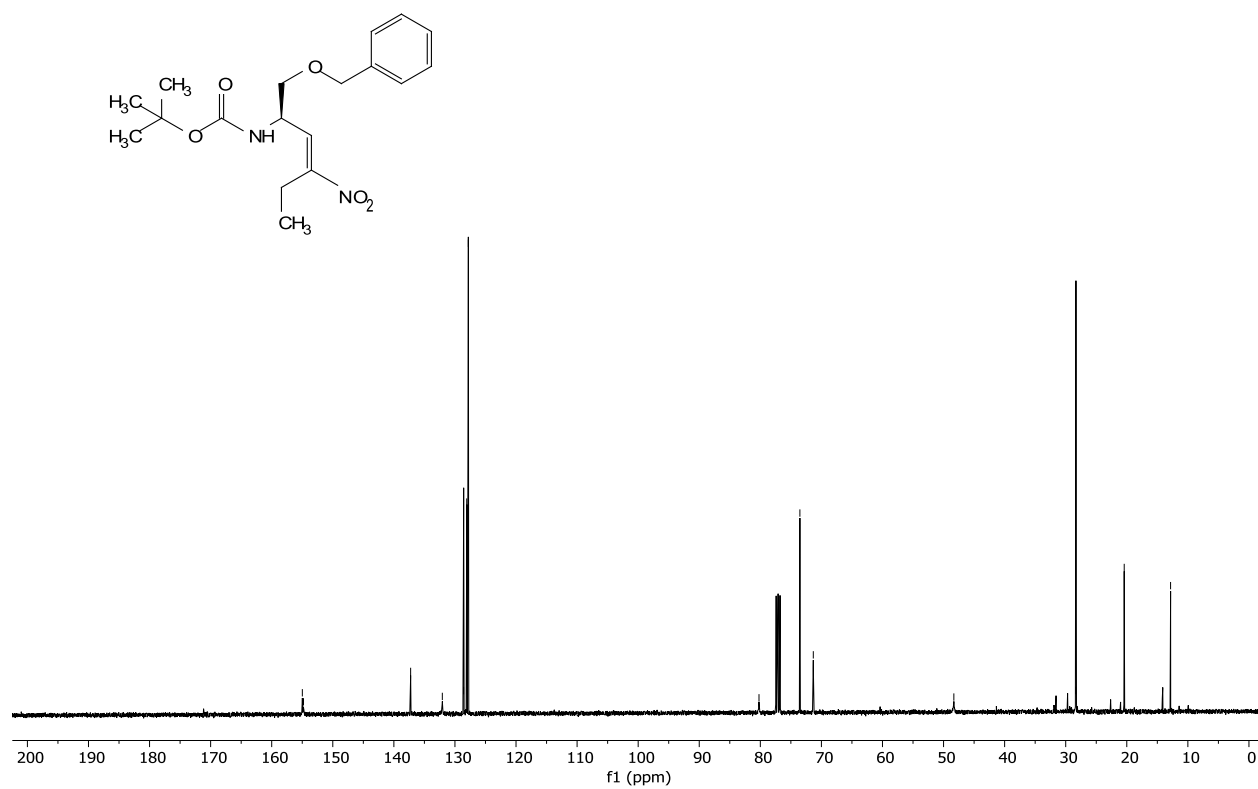

(3l)

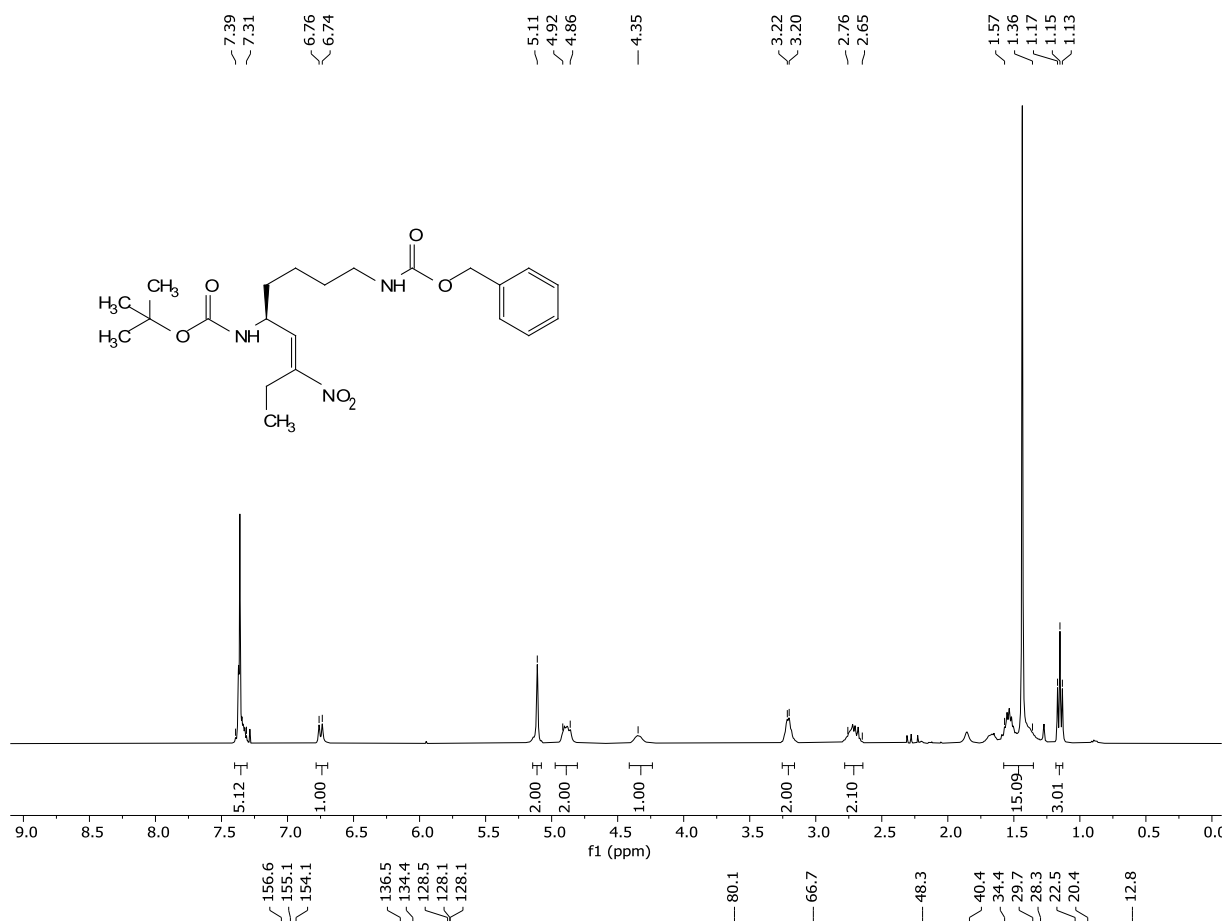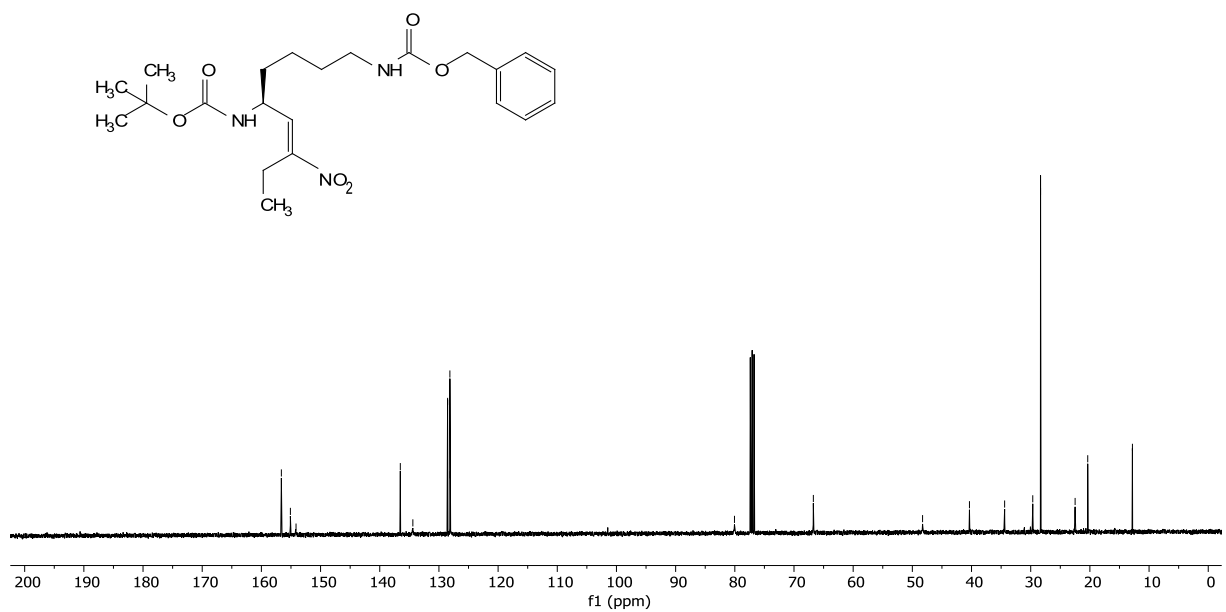

(3m)

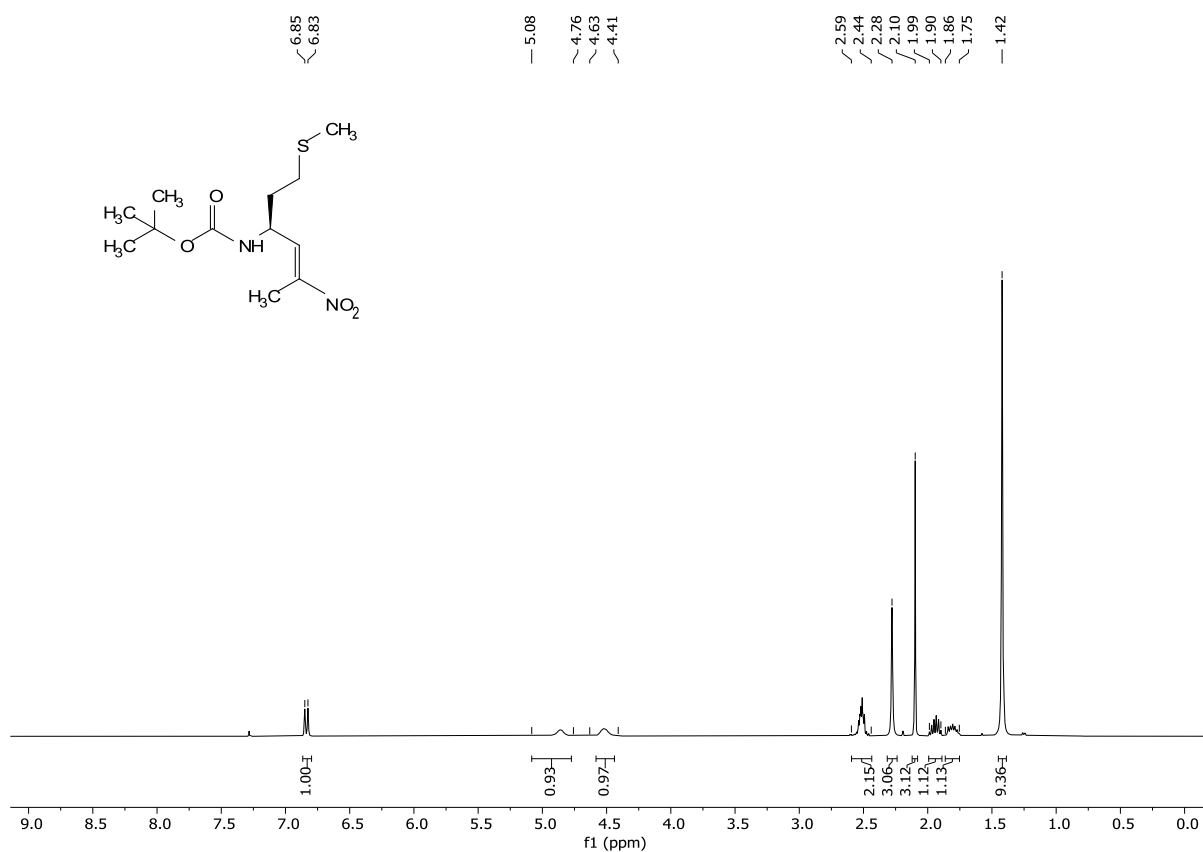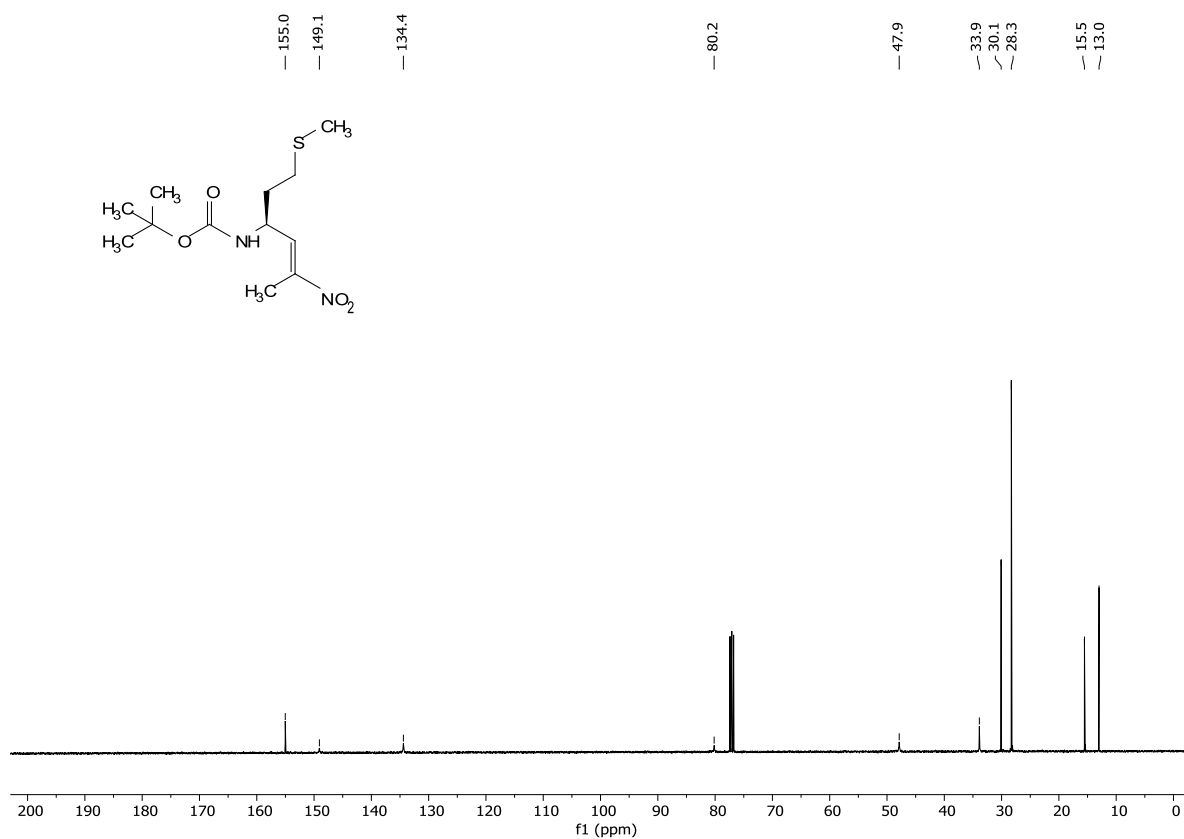

## (3n)

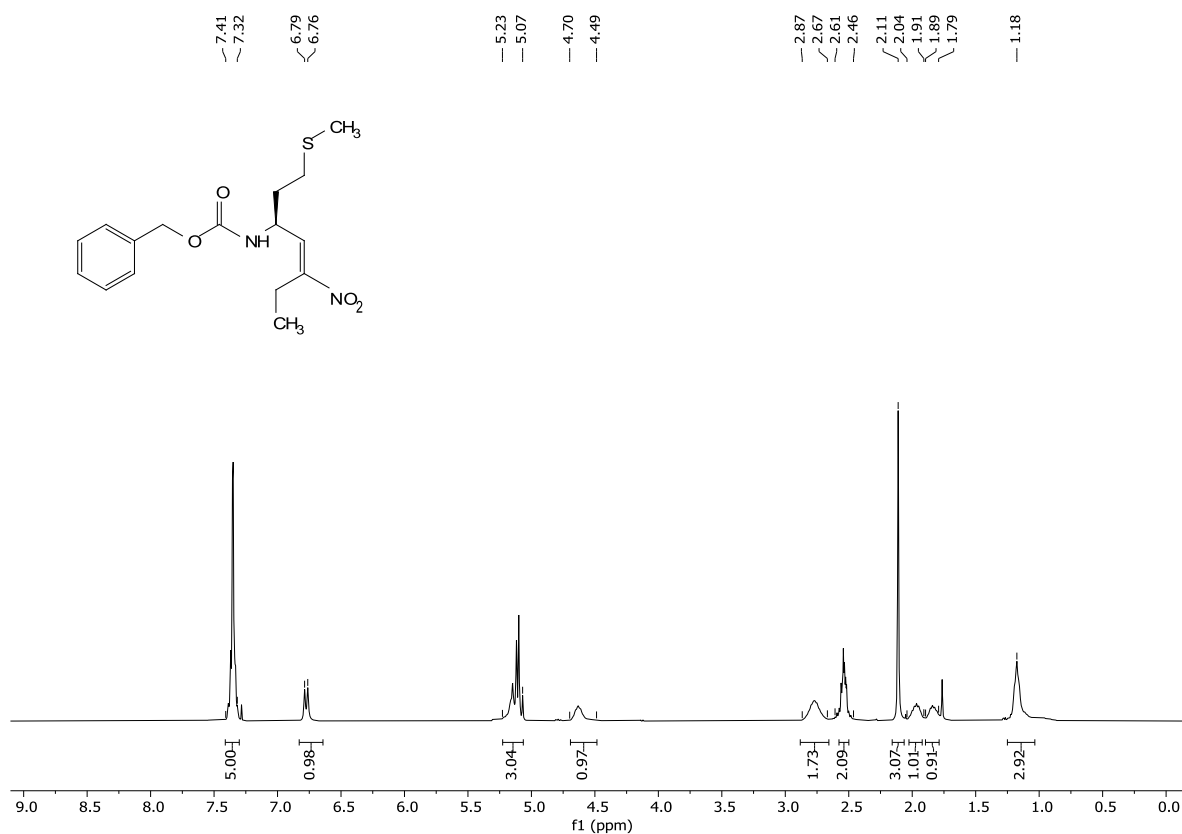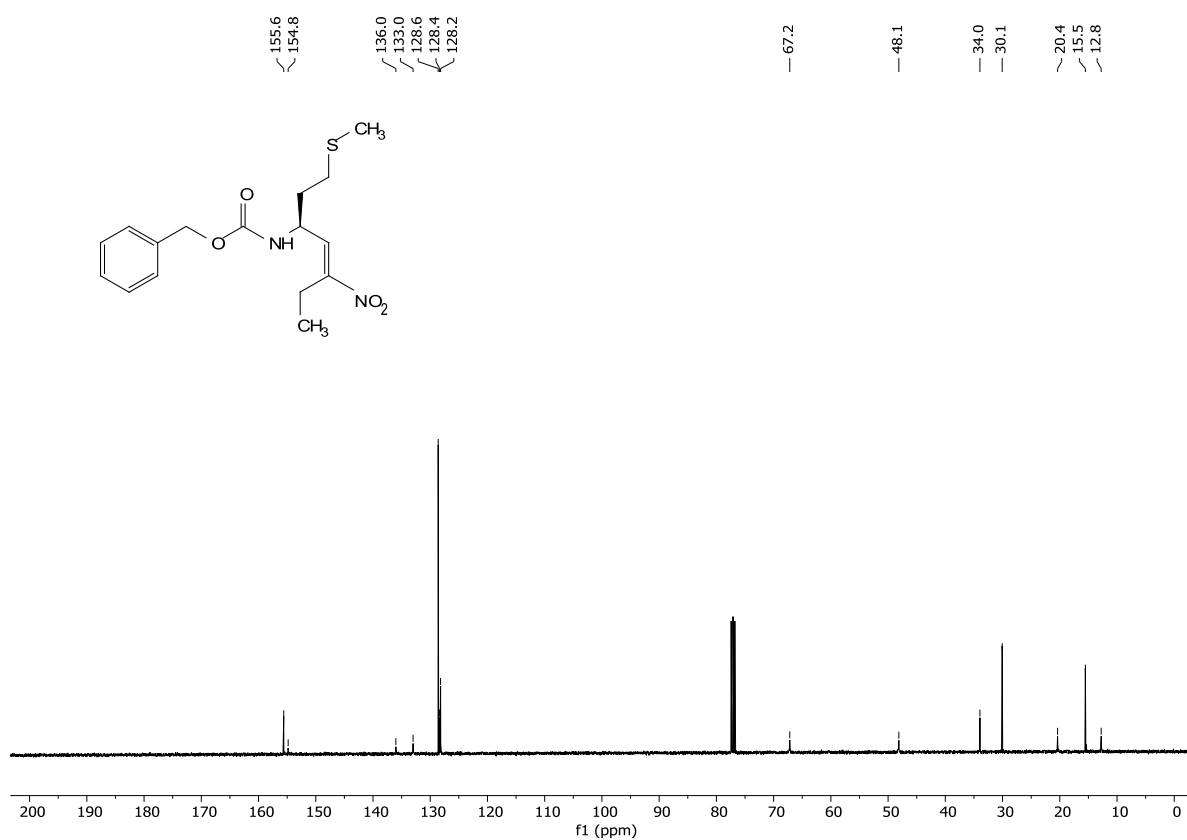

Supplement: s1 [file s1]
